# Supplementary material
Source: MDPI journal article supplement (https://www.mdpi.com/2076-3417/11/19/8908)
Supplement: s1 [file s1]

# Synthesis and Biological Evaluation of Thiazolyl-ethylidene hydrazino-thiazole Derivatives: A Novel Heterocyclic System

Laila A. Al-Mutabagani<sup>1</sup>, Fathy M. Abdelrazek<sup>2</sup>, Sobhi M. Gomha<sup>2,3,\*</sup>, Ali S. Hebishy<sup>4</sup>, Mohamed S. Abdelfattah<sup>4</sup>, Safaa M. Hassan<sup>4,5</sup>, Abdelwahed R. Sayed<sup>6,7</sup> and Mahmoud M. Elaasser<sup>8</sup>

<sup>1</sup> Department of Chemistry, College of Science, Princess Nourah bint Abdulrahman University, Riyadh 11671, Saudi Arabia; laalmutbagani@pnu.edu.sa

<sup>2</sup> Chemistry Department, Faculty of Science, Cairo University, 12613 Giza, Egypt.

<sup>3</sup> Chemistry Department, Faculty of Science, Islamic University of Madinah, Al-Madinah Al-Munawwarah, 42351 Saudi Arabia. E-mail: smgomha@iu.edu.sa

<sup>4</sup> Chemistry Department, Faculty of Science, Helwan University, Helwan, 11795, Egypt.

<sup>5</sup> Egyptian National Railways, Ministry of Transport, Cairo, Egypt.

<sup>6</sup> Department of Chemistry, Faculty of Science, KFUPM, Dhahran, Saudi Arabia

<sup>7</sup> Department of Chemistry, Faculty of Science, Beni-Suef University, Beni-suef, Egypt

<sup>8</sup> The Regional Center for Mycology and Biotechnology, Al-Azhar University, Cairo, 11371, Egypt.

\* Correspondence: s.m.gomha@gmail.com; Tel.: +2100-164-9576; Fax: +20-25685799

## 3. Experimental section

Elemental analyses were measured by using a German made Elementarvario LIII CHNS analyzer. Mass spectra were recorded on a Shimadzu GCMS-QP1000 EX mass spectrometer at 70 eV. Melting points were measured on an Electrothermal IA 9000 series digital melting point apparatus. NMR spectra were recorded on a Varian Mercury VX-300 NMR spectrometer operating at 400 MHz (<sup>1</sup>H-NMR) and run in deuterated dimethylsulphoxide (DMSO-*d*<sub>6</sub>). Chemical shifts were related to that of the solvent. <sup>13</sup>C-NMR was recorded on a BRUKER spectrometer at 100 MHz. IR spectra were recorded in potassium bromide discs on Pye-Unicam SP 3300 and Shimadzu FTIR 8101 PC infrared spectrophotometers.

## 3.2. Biological evaluation

### 3.2.1. Antimicrobial activity Assay

All microbial strains were provided from culture collection of the Regional Center for Mycology and Biotechnology (RCMB), Al-Azhar University, Cairo, Egypt. The antimicrobial activity was investigated on a dozen of newly synthesized compounds in order to increase the selectivity of these derivatives towards test microorganisms using well diffusion method [44]. Briefly, 100 µL of the test bacteria/fungi were grown in 10 mL of fresh media until they reached a count of approximately 10<sup>8</sup> cells/ml for bacteria or 10<sup>5</sup> cells/mL for fungi. One hundred µL of each sample (at 1 mg/mL) was added to each well (10 mm diameter holes cut in the agar gel). The plates were incubated for 24-48 h at 37 °C (for bacteria and yeast) and for 48 h at 28 °C (for filamentous fungi). After incubation, the microorganism's growth was observed. Ampicillin and gentamycin were used as standard antibacterial drugs while amphotricin B was used as standard antifungal drug. The resulting inhibition zone diameters were measured in millimeters and used as criterion for the antimicrobial activity. If an organism is placed on the agar it will not grow in the area around the well if it is susceptible to the chemical. This area of no growth around the disc is known as a Zone of inhibition. The size of the clear zone is proportional to the inhibitory action of the compound under investigation. Solvent controls (DMSO) were included in every experiment as negative controls. DMSO was used for dissolving the tested compounds and showed no inhibition zones, confirming that it has no influence on growth of the tested microorganisms.

### 3.2.2. MIC Determination:

The active compounds were further investigated to determine their antimicrobial activity expressed in terms of minimum inhibitory concentration (MIC) using the modified agar well diffusion method that mentioned above. Concentrations between 0.1-1000 µg/mL of each active compound were tested and compared with standard drugs. The MIC was then determined as the lowest concentration inhibiting growth of the organism after 24-48 hours [47].

### 3.2.3. Cytotoxicity assay:

The tested human carcinoma cell lines; MDA-MB-231 cells (human breast carcinoma), HepG-2 cells (human Hepatocellular carcinoma) and HCT-116 cells (human colon carcinoma) were obtained from the American Type Culture Collection (ATCC, Rockville, MD). The cells were grown on RPMI-1640 medium supplemented with 10% inactivated fetal calf serum and 50 µg/mL gentamycin (Lonza, Belgium). The cells were maintained at 37°C in a humidified atmosphere with 5% CO<sub>2</sub> and were subcultured two to three times a week during the period of experiment.

For antitumor assays, the tumor cell lines were suspended in medium at cell density of  $5 \times 10^4$  cells/well in Corning® 96-well tissue culture plates and then incubated for 24 hours. The tested compounds were then added into 96-well plates (six replicates) to achieve eight concentrations for each compound. Six vehicle controls with media or 0.5 % DMSO were run for each 96 well plate as a control. After incubating for 24 h, the numbers of viable cells were determined by the MTT assay [48]. Briefly, the media was removed from the 96-well plate and replaced with 100 µl of fresh culture RPMI 1640 medium without phenol red then 10 µL of the 12 mM MTT stock solution {5 mg of 3-(4,5-dimethylthiazol-2-yl)-2,5-diphenyltetrazolium bromide purchased from Sigma-Aldrich (St. Louis, MO) in 1 mL of Phosphate buffered saline} to each well including the untreated controls. The 96 well plates were then incubated at 37°C and 5% CO<sub>2</sub> for 4 hours. An 85 µl aliquot of the media was removed from the wells, and 50 µl of DMSO was added to each well and mixed thoroughly with the pipette and incubated at 37 °C for 10 min. Then, the optical density was measured at 590 nm with the microplate reader (SunRise, TECAN, Inc, USA) to determine the number of viable cells and the percentage of viability was calculated as  $[(OD_t/OD_c)] \times 100\%$  where OD<sub>t</sub> is the mean optical density of wells treated with the tested sample and OD<sub>c</sub> is the mean optical density of untreated cells. The relation between surviving cells and drug concentration is plotted to get the survival curve of each tumor cell line after treatment with the specified compound. The 50% inhibitory concentration (IC<sub>50</sub>), the concentration required to cause toxic effects in 50% of intact cells, was estimated from graphic plots of the dose response curve for each conc. using GraphPad Prism software (San Diego, CA. USA)[49].

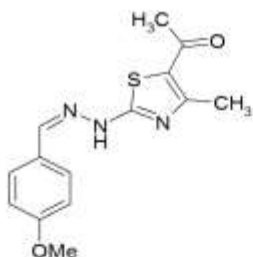

# Cairo University Micro Analytical Center

DI Analysis  
Shimadzu Qp-2010 Plus

Sample Information  
Analyzed by : Dr. Mai Younis  
Analyzed : 01/01/2007 08:08:15  
Sample Name : SH88  
Sample ID :  
Customer Name : Dr. Sobhy Goma - Science - Cairo  
Data File : C:\GCMSolution\Data\Project1\SH88.QGD  
Org Data File : C:\GCMSolution\Data\Project1\SH88.QGD  
Method File : C:\GCMSolution\Data\Project1\High Temperature Op  
Org Method File : C:\GCMSolution\Data\Project1\High Temperature Op  
Report File :  
Tuning File : C:\GCMSolution\System1\Tune1\\_default.qgt  
SEndf8Modified by : Dr. Mai Younis  
Modified : 01/01/2007 08:11:28

## Method

Analytical Line 1  
IonSourceTemp : 250.00 °C  
[MS Table]  
-Group 1 - Event 1-  
Start Time : 0.00min  
End Time : 10.00min  
Scan :  
Event Time : 0.50sec  
Scan Speed : 769  
Start m/z : 50.00  
End m/z : 400.00  
Electron Voltage : 70 eV  
Ionization Mode : EI

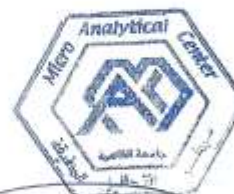

C:\GCMSolution\Data\Project1\SH88.QGD

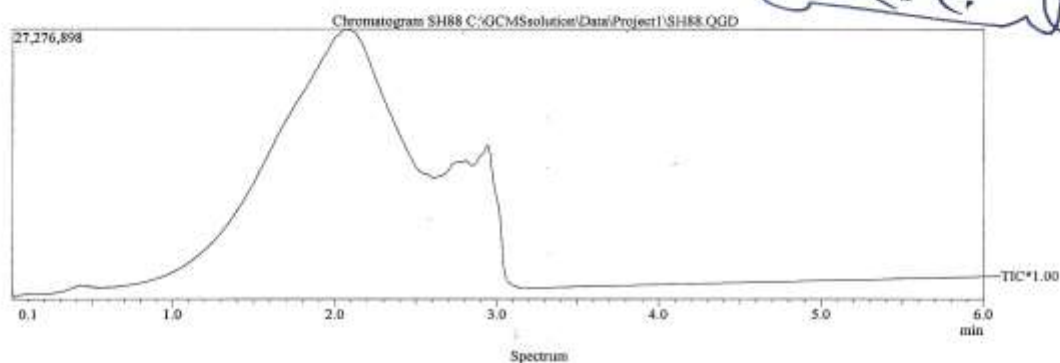

Line# 1 R.Time:2.1(Scan#:247)

MassPeaks:244

RawMode:Single 2.1(247) BasePeak:141(5282366)

BG Mode:None Group 1 - Event 1

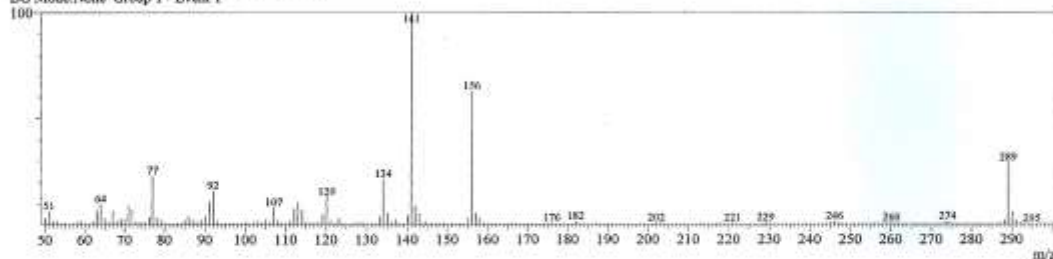

## Mass Table

Line# 1 R.Time:2.1(Scan#:247)

MassPeaks:244

RawMode:Single 2.1(247) BasePeak:141(5282366)

BG Mode:None Group 1 - Event 1

| # | m/z   | Abs. In | Rel. Int. | # | m/z   | Abs. In | Rel. Int. | # | m/z   | Abs. In | Rel. Int. |
|---|-------|---------|-----------|---|-------|---------|-----------|---|-------|---------|-----------|
| 1 | 50.05 | 165713  | 3.14      | 4 | 53.05 | 95380   | 1.81      | 7 | 56.05 | 13389   | 0.25      |
| 2 | 51.05 | 326223  | 6.18      | 5 | 54.05 | 28536   | 0.54      | 8 | 57.05 | 35505   | 0.67      |
| 3 | 52.05 | 76720   | 1.45      | 6 | 55.05 | 38755   | 0.73      | 9 | 58.00 | 73591   | 1.39      |

Figure S1. Mass Spectra of compound 6

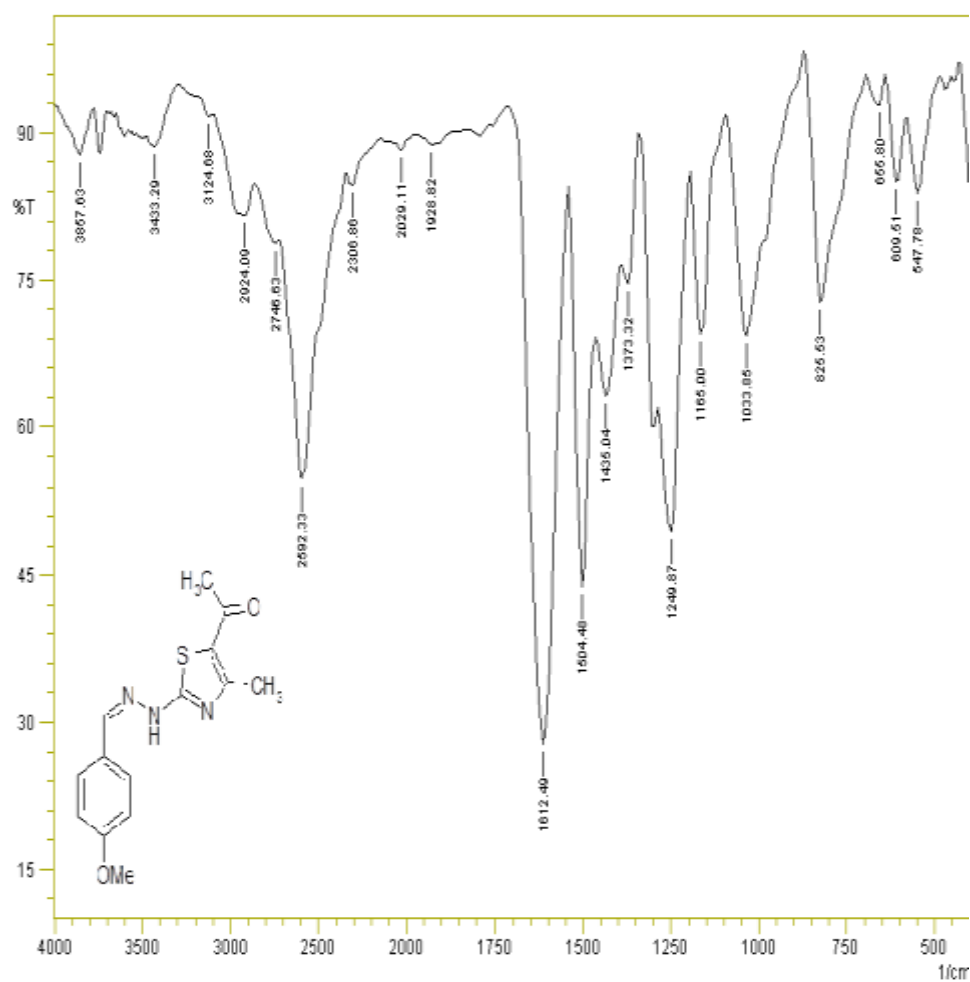

**Figure S2. IR Spectra of compound 6**

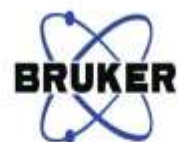

Current Data Parameters  
NAME ali-salah-9898  
EXPNO 1  
PROCNO 1

F2 - Acquisition Parameters  
Date\_ 20190327  
Time 10.28  
INSTRUM spect  
PROBHD 5 mm PABBO BBO  
PULPROG zg30  
TD 65536  
SOLVENT DMSO  
NS 16  
DS 2  
SWH 8012.820 Hz  
FIDRES 0.122256 Hz  
AQ 4.3894465 sec  
RG 255.37  
CW 62.400 usec  
DE 6.50 usec  
TE 297.9 K  
D1 1.0000000 sec  
TD0 1

===== CHANNEL F1 =====  
SFO1 400.1524711 MHz  
NUC1 1H  
P1 12.00 usec  
PLW1 18.0000000 W

F2 - Processing parameters  
SI 65536  
SF 400.1500000 MHz  
WDW EM  
SSB 0  
LB 0.30 Hz  
GB 0  
PC 1.00

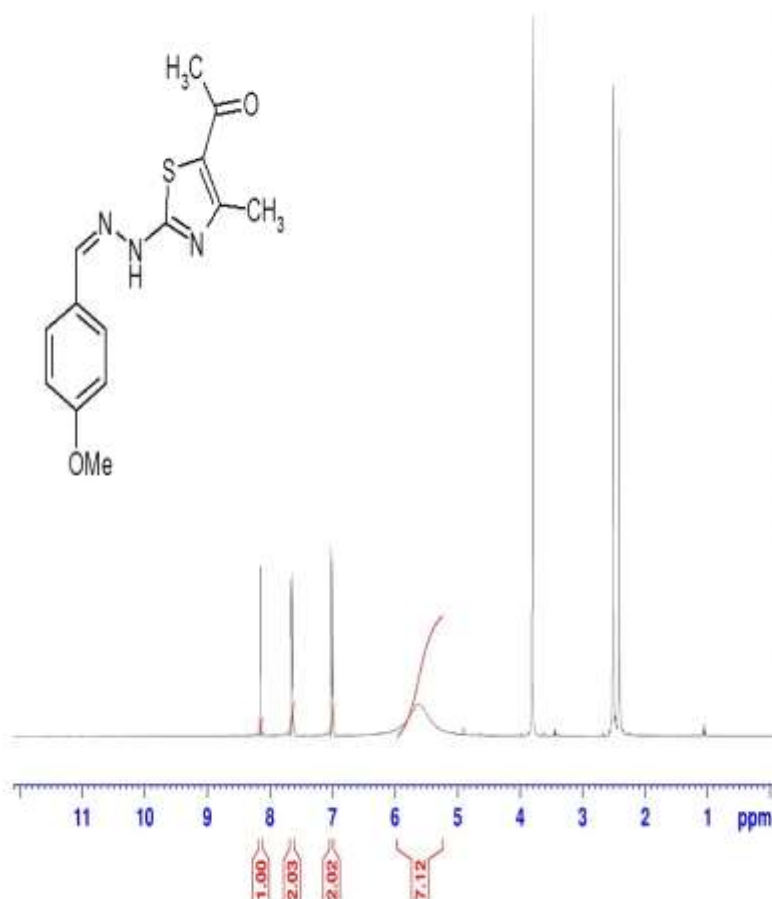

Figure S3. <sup>1</sup>H NMR Spectra of compound 6

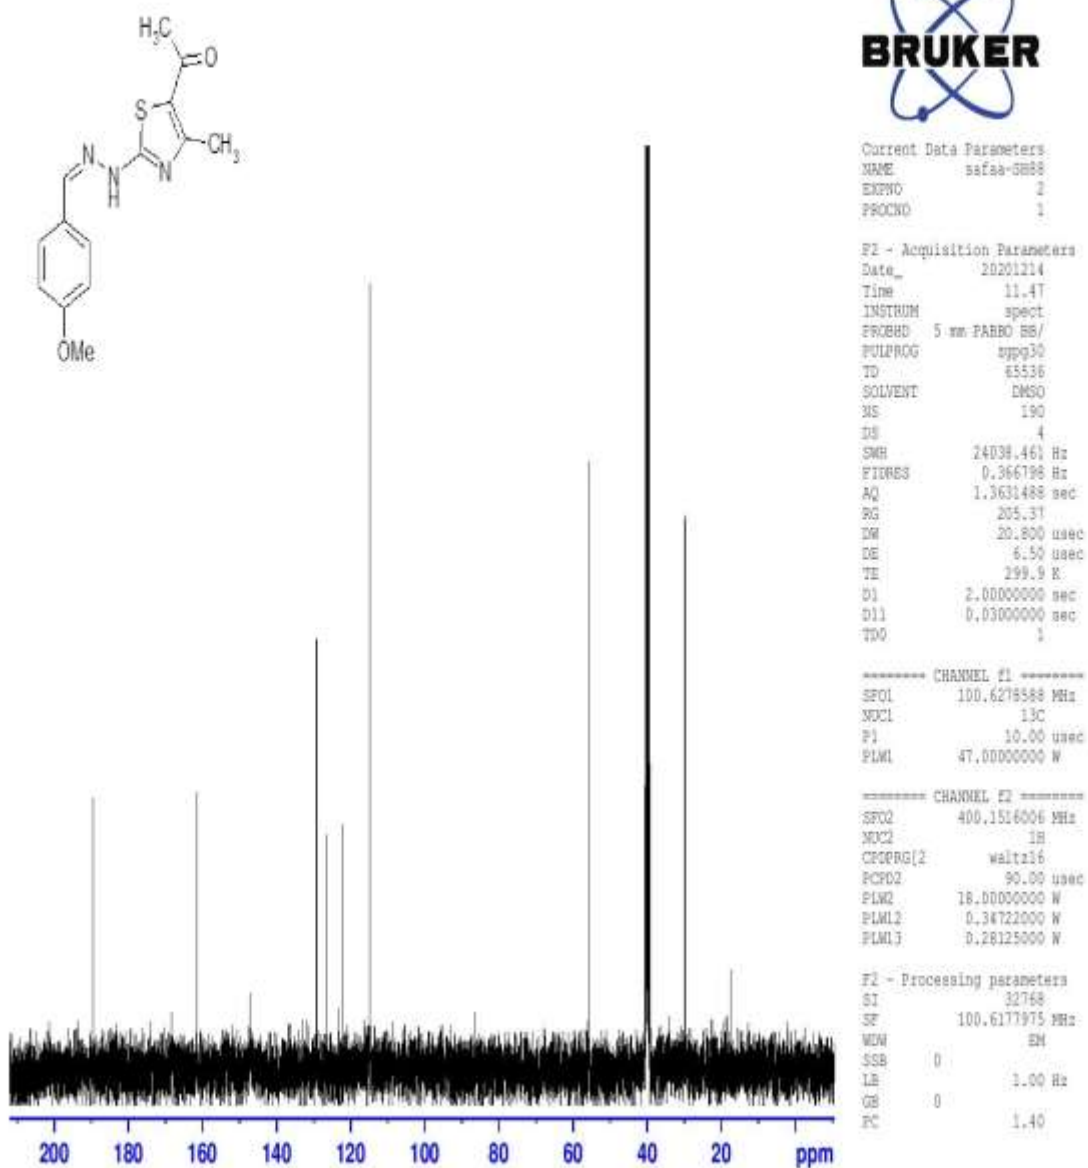

**Figure S4. <sup>13</sup>C Spectra of compound 6**

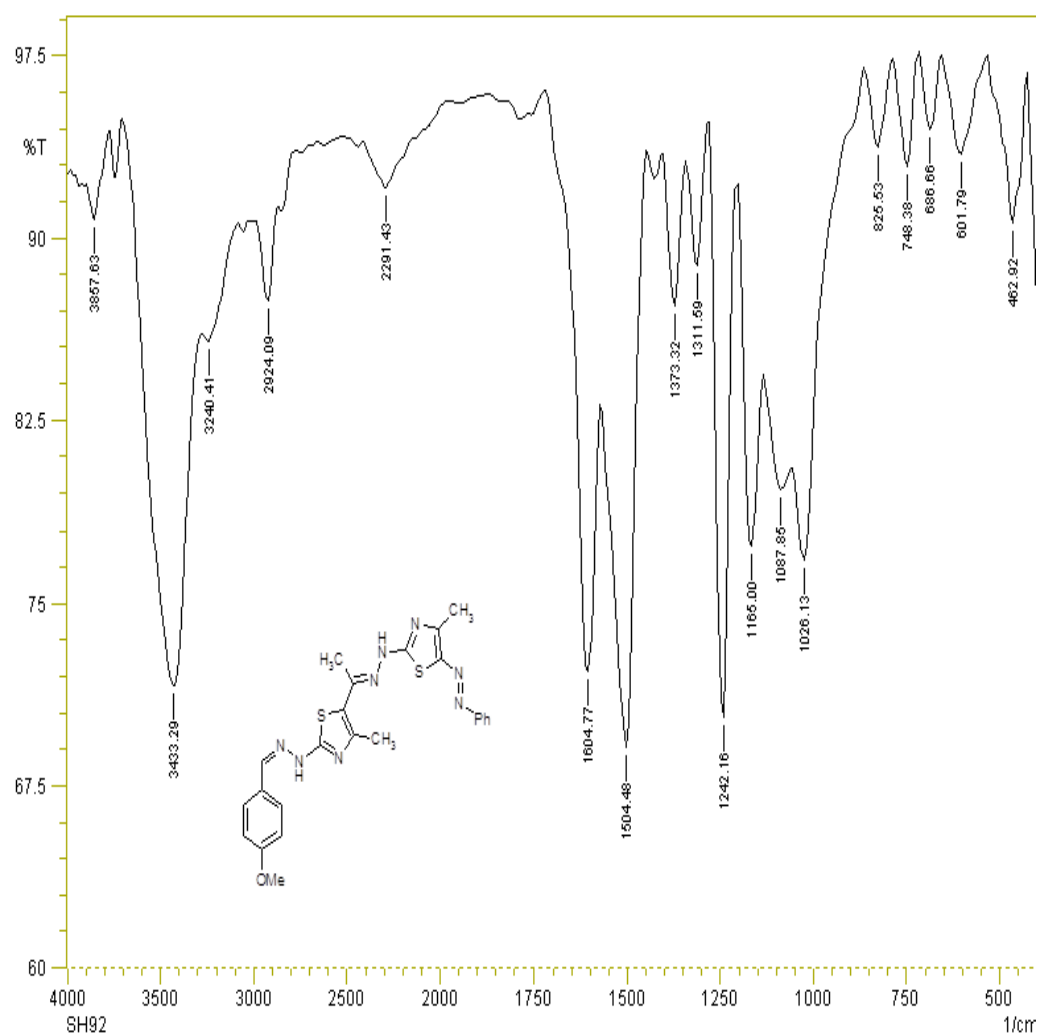

**Figure S5. IR Spectra of compound 10a**

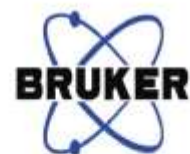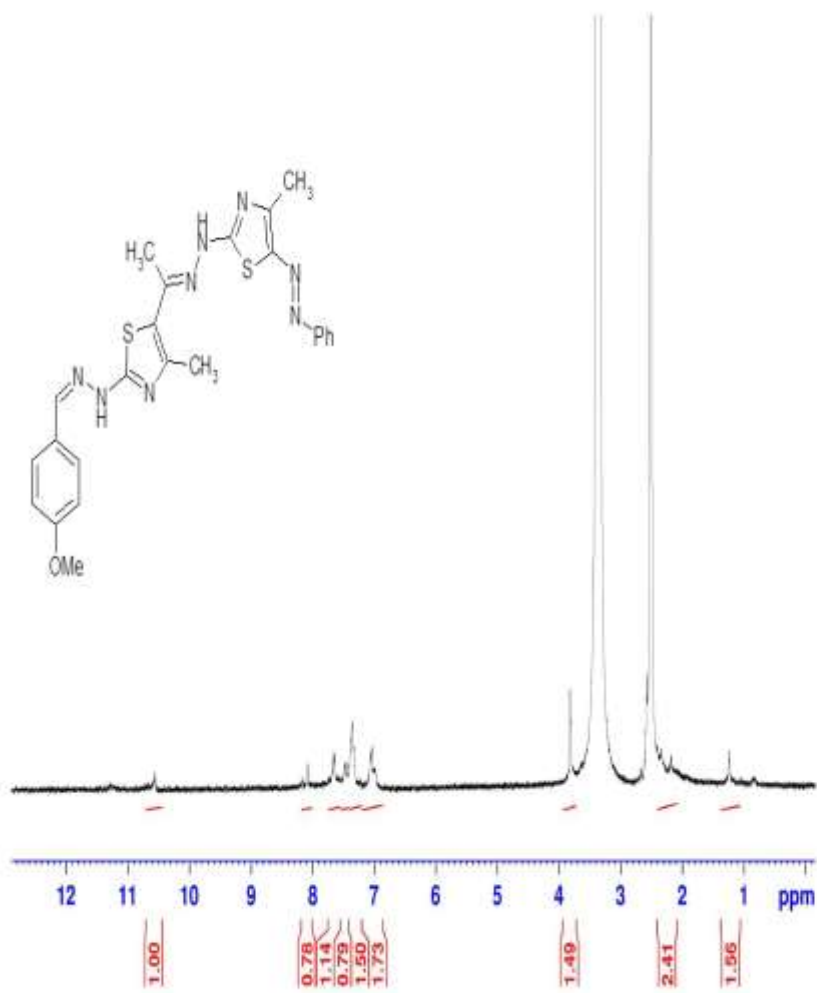

Current Data Parameters  
 NAME all-malah-8842  
 EXPNO 1  
 PROCNO 1

F2 - Acquisition Parameters  
 Date\_ 20190327  
 Time 10.04  
 INSTRUM spect  
 PROBHD 5 mm PARBO BB/  
 PULPROG zg30  
 TD 65536  
 SOLVENT DMSO  
 NS 43  
 DS 2  
 SWH 4012.820 Hz  
 FIDRES 0.122246 Hz  
 AQ 4.0894445 sec  
 RG 205.17  
 DW 62.400 usec  
 DE 6.30 usec  
 TE 298.0 K  
 D1 1.00000000 sec  
 TDO 1

\*\*\*\*\* CHANNEL f1 \*\*\*\*\*  
 SFO1 400.1524711 MHz  
 NUC1 1H  
 P1 12.00 usec  
 PL1 18.00000000 W

F2 - Processing parameters  
 SI 65536  
 SF 400.1500000 MHz  
 XWD EM  
 SSB 0  
 LB 0.30 Hz  
 GB 0  
 PC 1.00

Figure S6. <sup>1</sup>H NMR Spectra of compound 10a



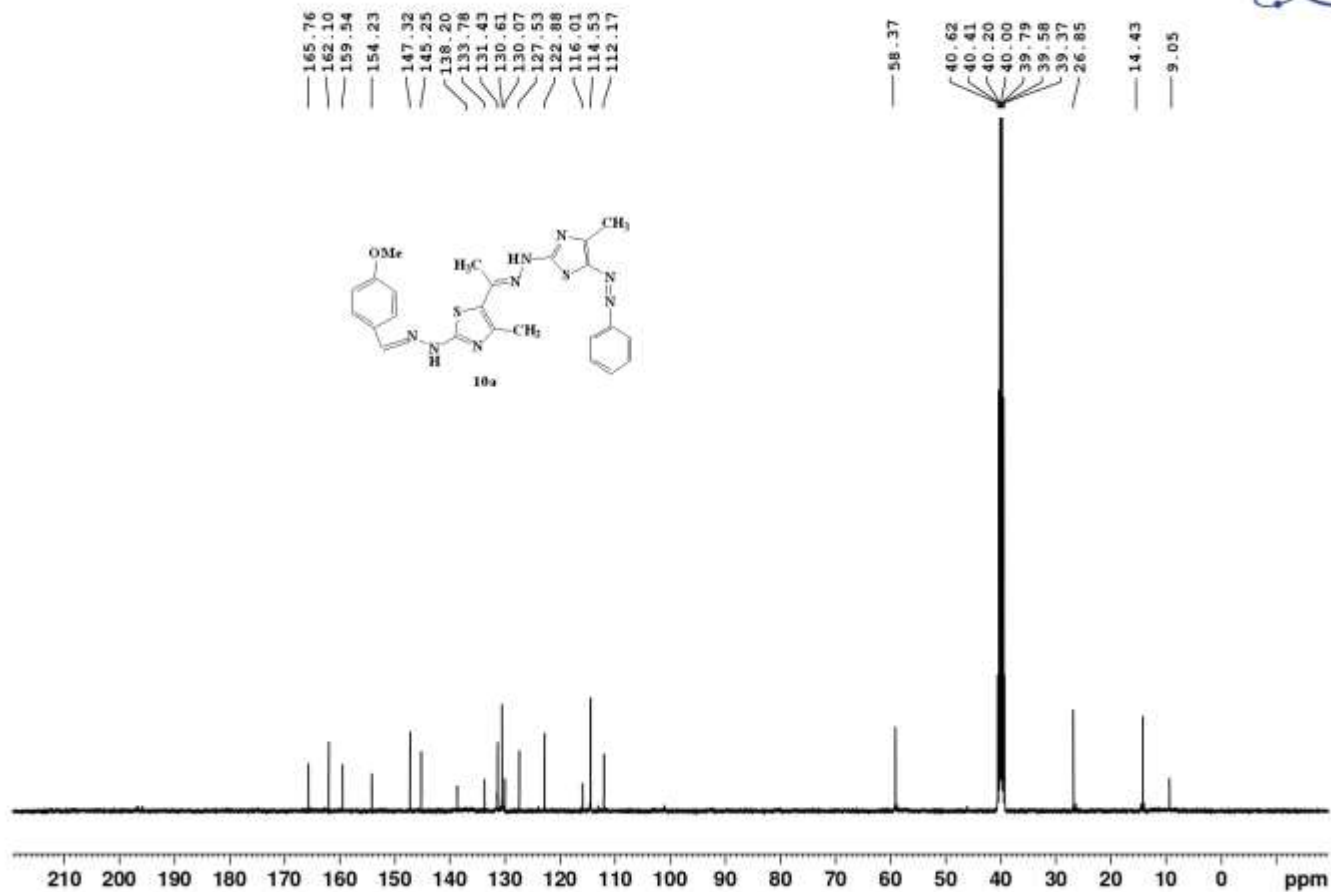

Figure S7. <sup>13</sup>CNMR Spectra of compound 10a

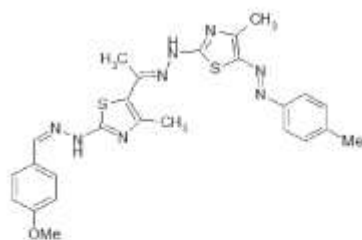

# Cairo University Micro Analytical Center

DI Analysis  
Shimadzu Qp-2010 Plus

Sample Information  
Analyzed by : Dr. Mai Younis  
Analyzed : 01/01/2007 08:24:14  
Sample Name : SH90  
Sample ID :  
Customer Name : Dr. Sobhy Goma - Science - Cairo  
Data File : C:\GCMSolution\Data\Project1\SH90.QGD  
Org Data File : C:\GCMSolution\Data\Project1\SH90.QGD  
Method File : C:\GCMSolution\Data\Project1\High Temperature Op  
Org Method File : C:\GCMSolution\Data\Project1\High Temperature Op  
Report File :  
Tuning File : C:\GCMSolution\System\Tune1\\_default.qst  
StdIn/Modified by : Dr. Mai Younis  
Modified : 01/01/2007 08:28:49

Method  
Analytical Line 1  
IonSourceTemp : 250.00 °C  
[MS Table]  
--Group 1 - Event 1--  
Start Time : 0.00min  
End Time : 10.00min  
Scan :  
Event Time : 0.50sec  
Scan Speed : 1250  
Start m/z : 50.00  
End m/z : 600.00  
Electron Voltage : 70 eV  
Ionization Mode : EI

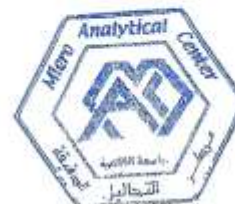

Handwritten signature and date: 1/1/07

C:\GCMSolution\Data\Project1\SH90.QGD

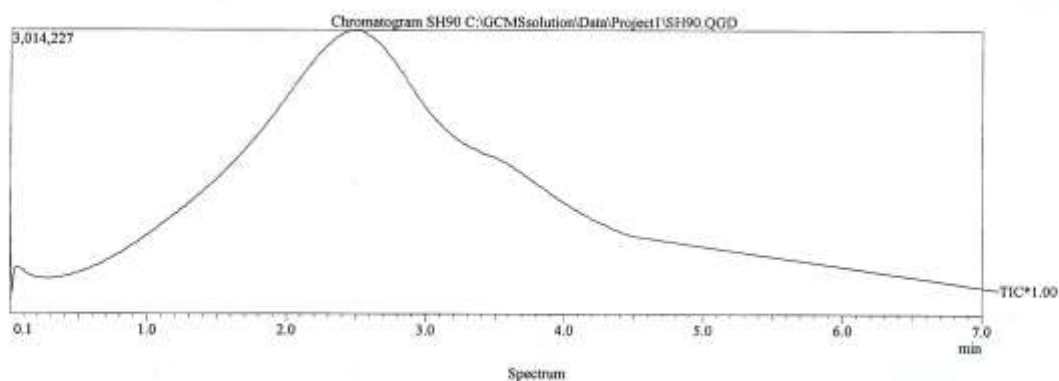

Line# 1 R.Time:2.5(Scan#:305)  
MassPeaks:458  
RawMode:Single 2.5(305) BasePeak:91(182978)  
BG Mode:None Group 1 - Event 1

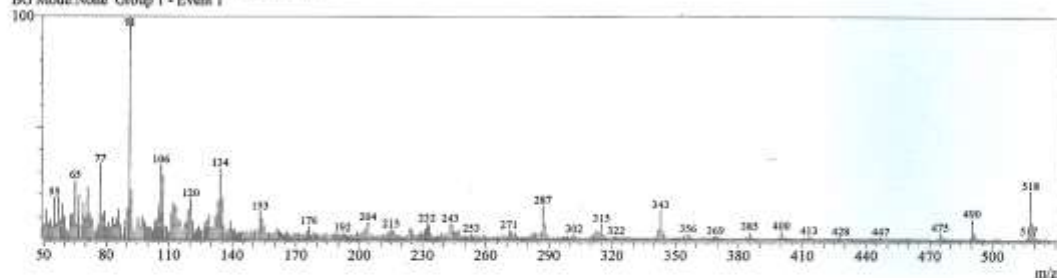

Mass Table  
Line# 1 R.Time:2.5(Scan#:305)  
MassPeaks:458  
RawMode:Single 2.5(305) BasePeak:91(182978)  
BG Mode:None Group 1 - Event 1

| # | m/z   | Abs. In | Rel. Int. | # | m/z   | Abs. In | Rel. Int. | # | m/z   | Abs. In | Rel. Int. |
|---|-------|---------|-----------|---|-------|---------|-----------|---|-------|---------|-----------|
| 1 | 50.05 | 12027   | 6.57      | 4 | 53.05 | 15414   | 8.42      | 7 | 56.10 | 12223   | 6.68      |
| 2 | 51.05 | 24047   | 13.14     | 5 | 54.05 | 10326   | 5.64      | 8 | 57.05 | 34920   | 19.08     |
| 3 | 52.05 | 12554   | 6.86      | 6 | 55.05 | 33890   | 18.52     | 9 | 58.05 | 15134   | 8.27      |

Figure S8. Mass Spectra of compound 10b

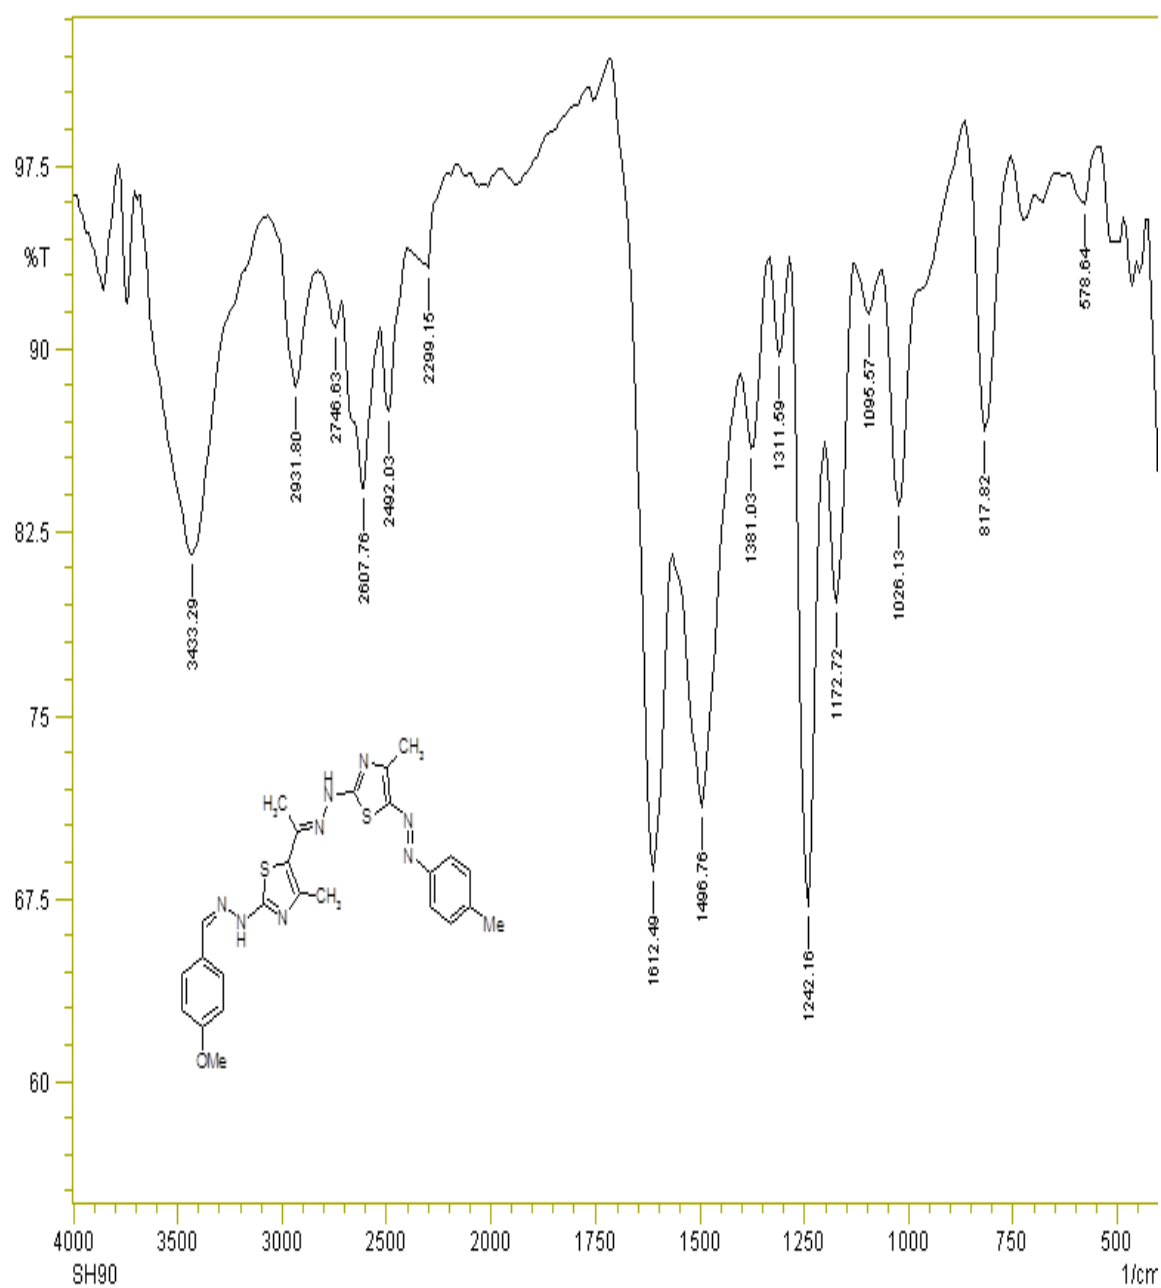

**Figure S9. IR Spectra of compound 10b**

Current Data Parameters  
NAME Safaa Mahmoud\_H\_SH90  
EXTNO 19  
PROCNO 1

F2 - Acquisition Parameters

Date\_ 28/03/21  
Time 14.32  
INSTRUM spect  
PROBHD 5 mm VAMBO BB/  
PULPROG zgpg30  
TD 65536  
SOLVENT DMSO  
NS 32  
DS 2  
SWH 3812.821 Hz  
FIDRES 0.122256 Hz  
AQ 4.8894661 sec  
RG 64.31  
SW 82.438 umw  
SE 5.51 usec  
TE 298.2 K  
F2 1.0000000 sec  
FID

===== CHANNEL F1 =====

NUC1 400.1904713 MHz  
NUC1 1H  
P1 15.00 usec  
PLW1 20.39599462 W

F2 - Processing parameters

SI 65536  
SF 400.1900000 MHz  
WDW EM  
SSB 0  
LB 0.30 Hz  
GB 0  
PC 1.00

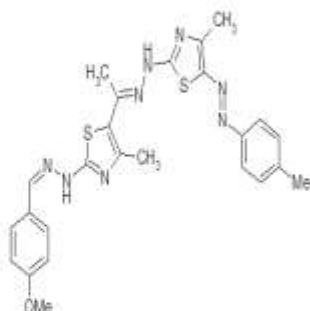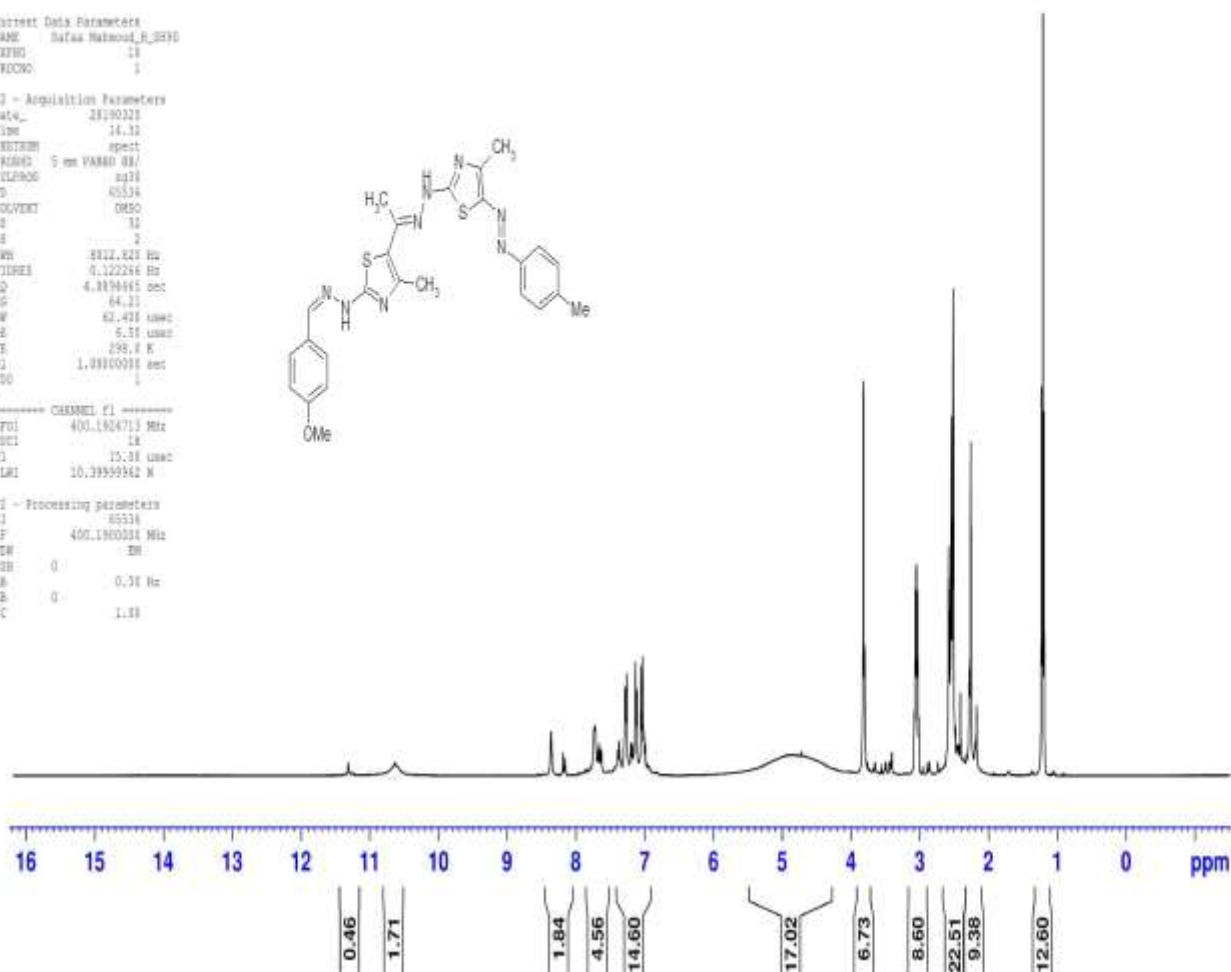

Figure S10. <sup>1</sup>H NMR Spectra of compound 10b

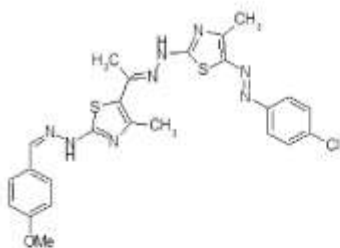

**Cairo University  
Micro Analytical Center**

**DI Analysis  
Shimadzu Qp-2010 Plus**

Sample Information  
Analyzed by : Dr. Mai Younis  
Analyzed : 01/01/2007 08:32:36  
Sample Name : SH91  
Sample ID :  
Customer Name : Dr. Sobhy Gomaa - Science - Cairo  
Data File : C:\GCMSolution\Data\Project\SH91.QGD  
Orig. Data File : C:\GCMSolution\Data\Project\SH91.QGD  
Method File : C:\GCMSolution\Data\Project\High Temperature Cp  
Orig. Method File : C:\GCMSolution\Data\Project\High Temperature Cp  
Report File :  
Tuning File : C:\GCMSolution\System\Tune\1\_default.qgt  
\$EndIR\$ Modified by : Dr. Mai Younis  
Modified : 01/01/2007 08:38:36

**Method**

Analytical Line 1  
IonSourceTemp : 250.00 °C  
[MS Table]  
-Group 1 - Event 1-  
Start Time : 0.00min  
End Time : 10.00min  
Scan :  
ACQ Mode :  
Event Time : 0.50sec  
Scan Speed : 1250  
Start m/z : 50.00  
End m/z : 650.00

Electron Voltage : 70 eV  
Ionization Mode : EI

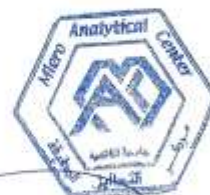

C:\GCMSolution\Data\Project\SH91.QGD

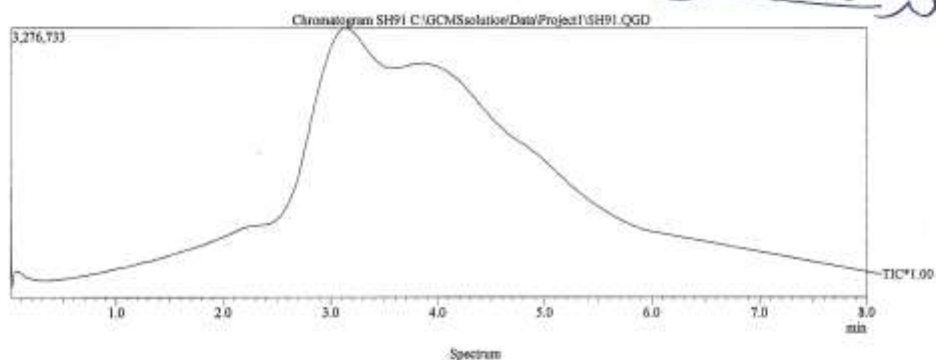

Line# 1 R.Time:4.0(Scan#:477)  
MassPeaks:487  
RawMode:Single 4.0(477) BasePeak:111(101590)  
BG Mode:None Group 1 - Event 1

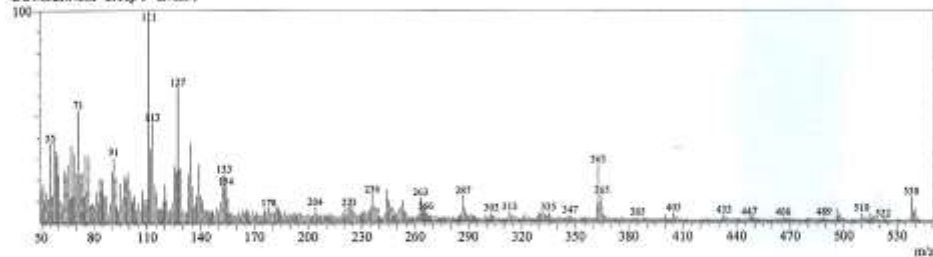

Mass Table  
Line# 1 R.Time:4.0(Scan#:477)  
MassPeaks:487  
RawMode:Single 4.0(477) BasePeak:111(101590)  
BG Mode:None Group 1 - Event 1

| # | m/z   | Abs. In | Rel. Int. | # | m/z   | Abs. In | Rel. Int. | # | m/z   | Abs. In | Rel. Int. |
|---|-------|---------|-----------|---|-------|---------|-----------|---|-------|---------|-----------|
| 1 | 50.00 | 15460   | 15.22     | 4 | 53.05 | 13881   | 13.66     | 7 | 56.10 | 12959   | 12.76     |
| 2 | 51.05 | 18262   | 17.98     | 5 | 54.05 | 11145   | 10.97     | 8 | 57.05 | 39906   | 39.28     |
| 3 | 52.05 | 10457   | 10.29     | 6 | 55.05 | 37597   | 37.01     | 9 | 58.05 | 33877   | 33.35     |

**Figure S11. Mass Spectra of compound 10c**

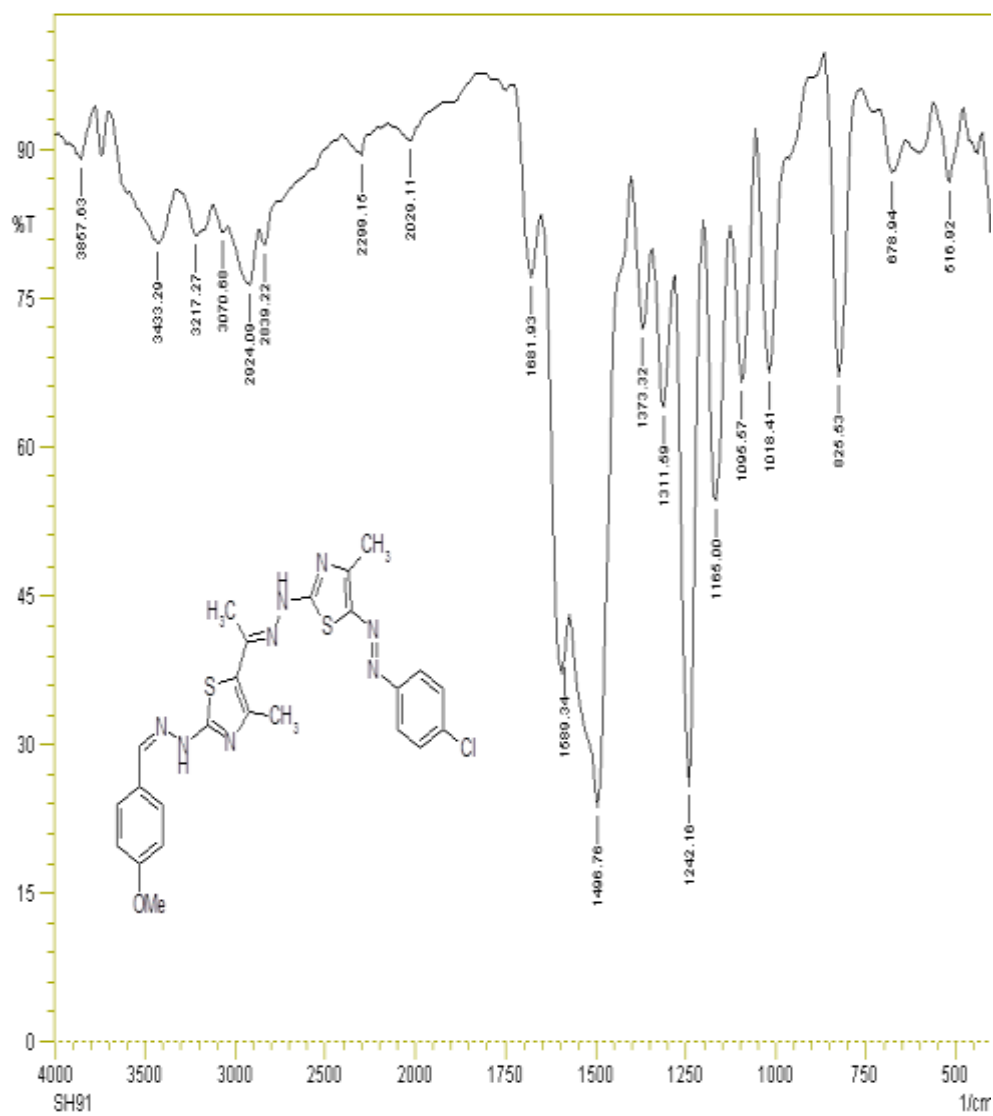

**Figure S12. IR Spectra of compound 10c**

Current Data Parameters  
NAME Safaa Mahmoud\_H\_SH91  
EXPNO 13  
PROCNO 1

## F2 - Acquisition Parameters

Date\_ 20190325  
Time 14.37  
INSTRUM spect  
PULPROG 5 on PRISM 89/  
PULPROG 8033  
TD 40574  
SOLVENT DMSO  
NS 32  
DS 2  
SWH 8012.320 Hz  
FIDRES 0.102266 Hz  
AQ 4.0094481 sec  
RG 302.37  
RF 62.423 usec  
SFO 4.51 usec  
TE 298.2 K  
F2 1.00000000 sec  
TDE 1

## ===== CHANNEL f1 =====

NUC1 400.1304713 MHz  
P1 10.00 usec  
PL1 13.289999912 W

## F2 - Processing parameters

SI 65334  
SF 400.1300000 MHz  
WDW EM  
SSB 0  
LA 0 0.30 Hz  
GB 0  
PC 1.00

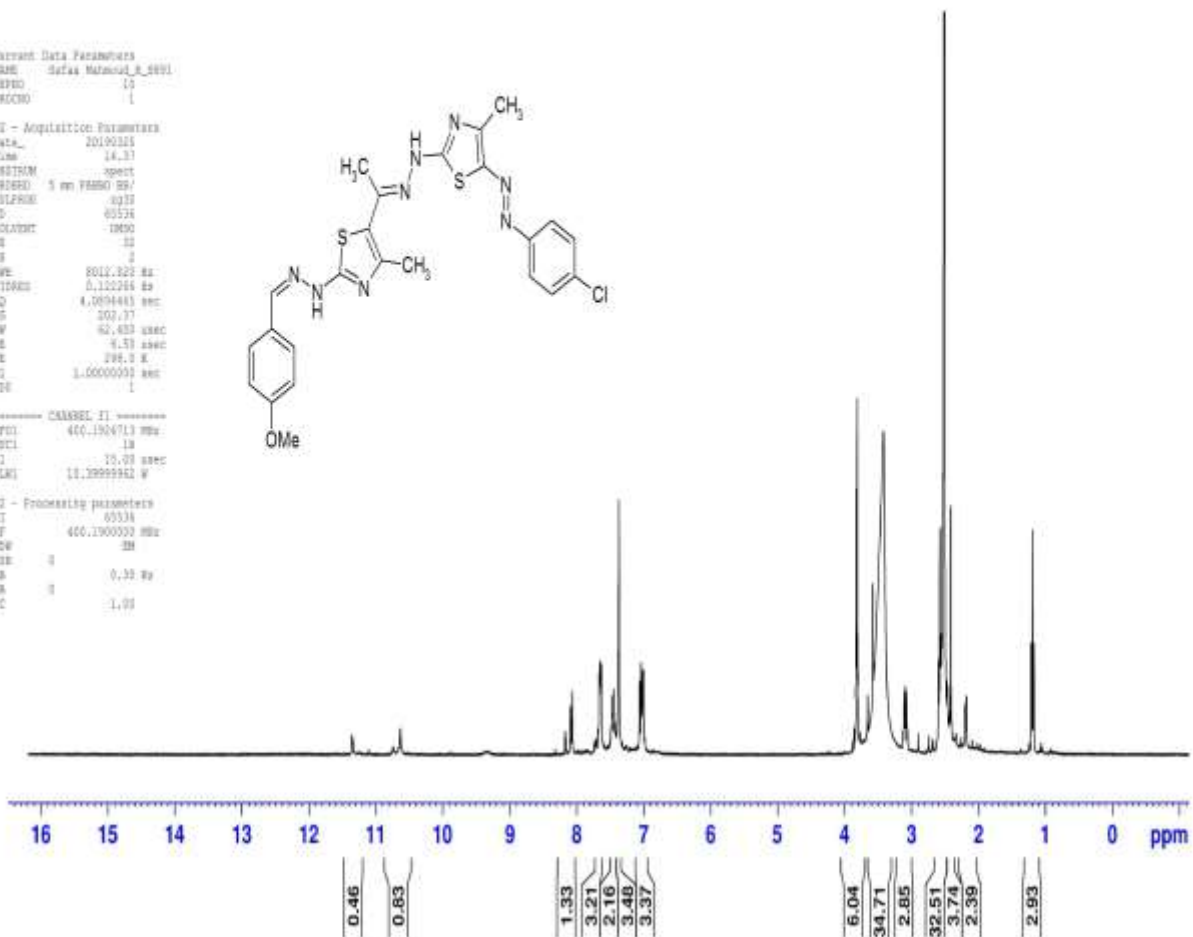

Figure S13. <sup>1</sup>H NMR Spectra of compound 10c

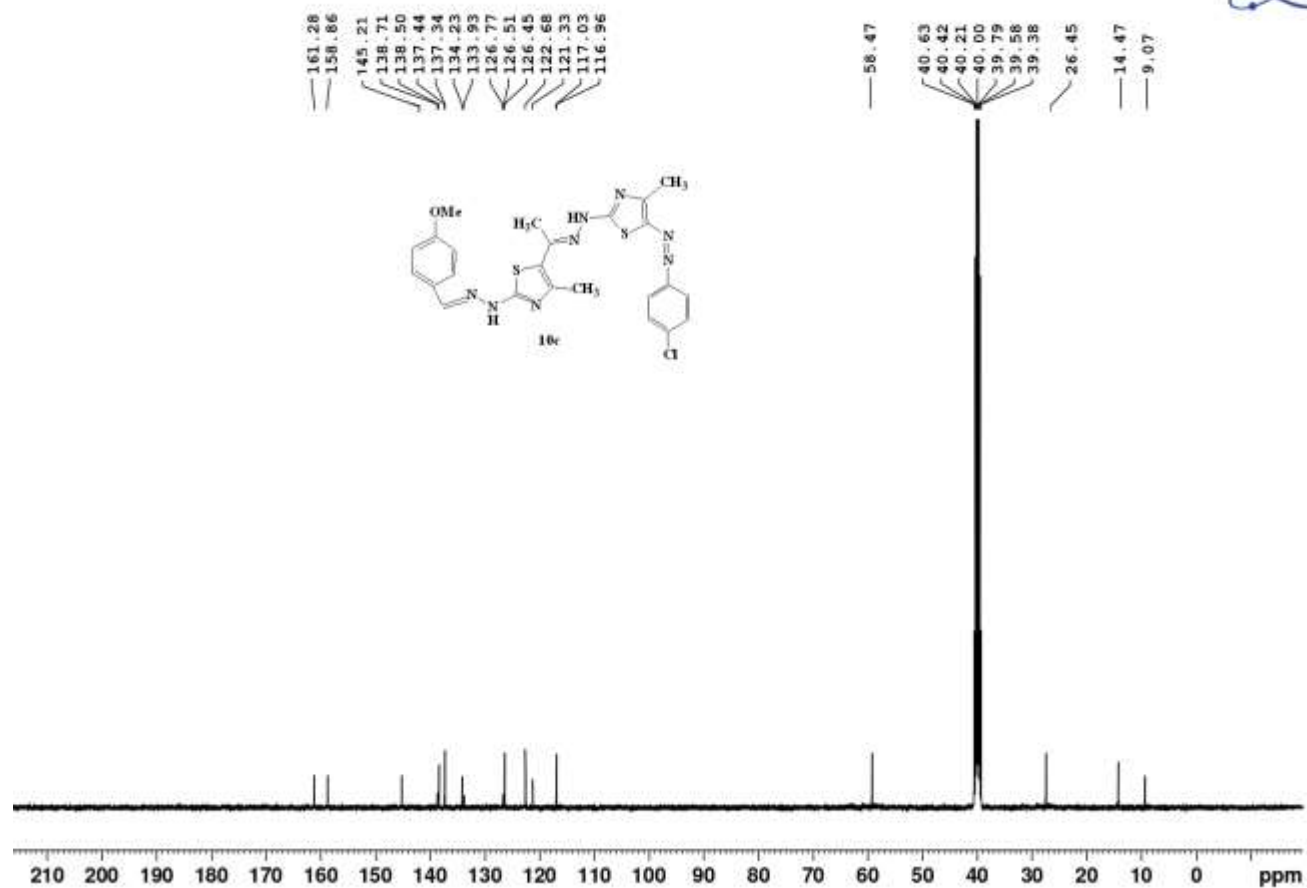

Figure S14. <sup>13</sup>CNMR Spectra of compound 10c



**Figure S15. Mass Spectra of compound 10d**

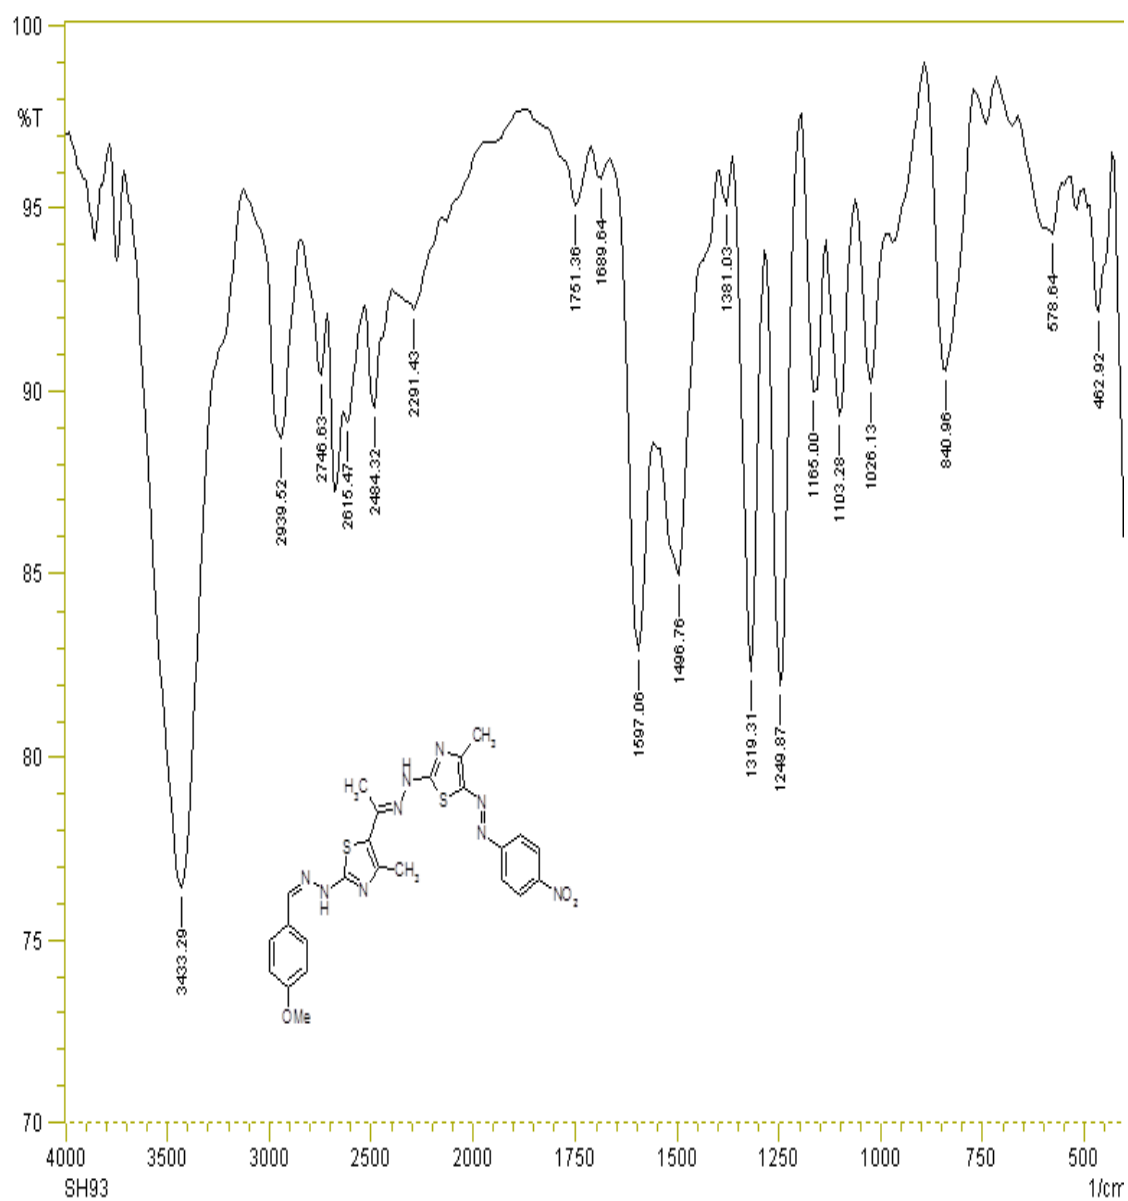

**Figure S16. IR Spectra of compound 10d**

Current Data Parameters  
NAME Safaa Mahmoud\_H\_SH93  
EXPNO 10  
PROCNO 1

F2 - Acquisition Parameters  
Date\_ 20190325  
Time 14.42  
INSTRUM spect  
PROBHD 5 mm HMQC BB/  
PULPROG zgpg30  
TD 65536  
SOLVENT DMSO  
NS 10  
DS 2  
SWH 8012.820 Hz  
FIDRES 0.122366 Hz  
AQ 8.0894400 sec  
RG 64.21  
SN 61.400 umax  
SC 8.50 umax  
TK 298.0 K  
SL 1.00000000 sec  
TD0 1

===== CHANNEL f1 =====  
NUC1 13C-132471.1 MHz  
NUC2 1H  
P1 15.00 umax  
PLA1 10.39359962 W

F2 - Processing parameters  
SI 32768  
SF 400.1300000 MHz  
WDW EM  
SSB 0  
LB 0.30 Hz  
GB 0  
PC 1.00

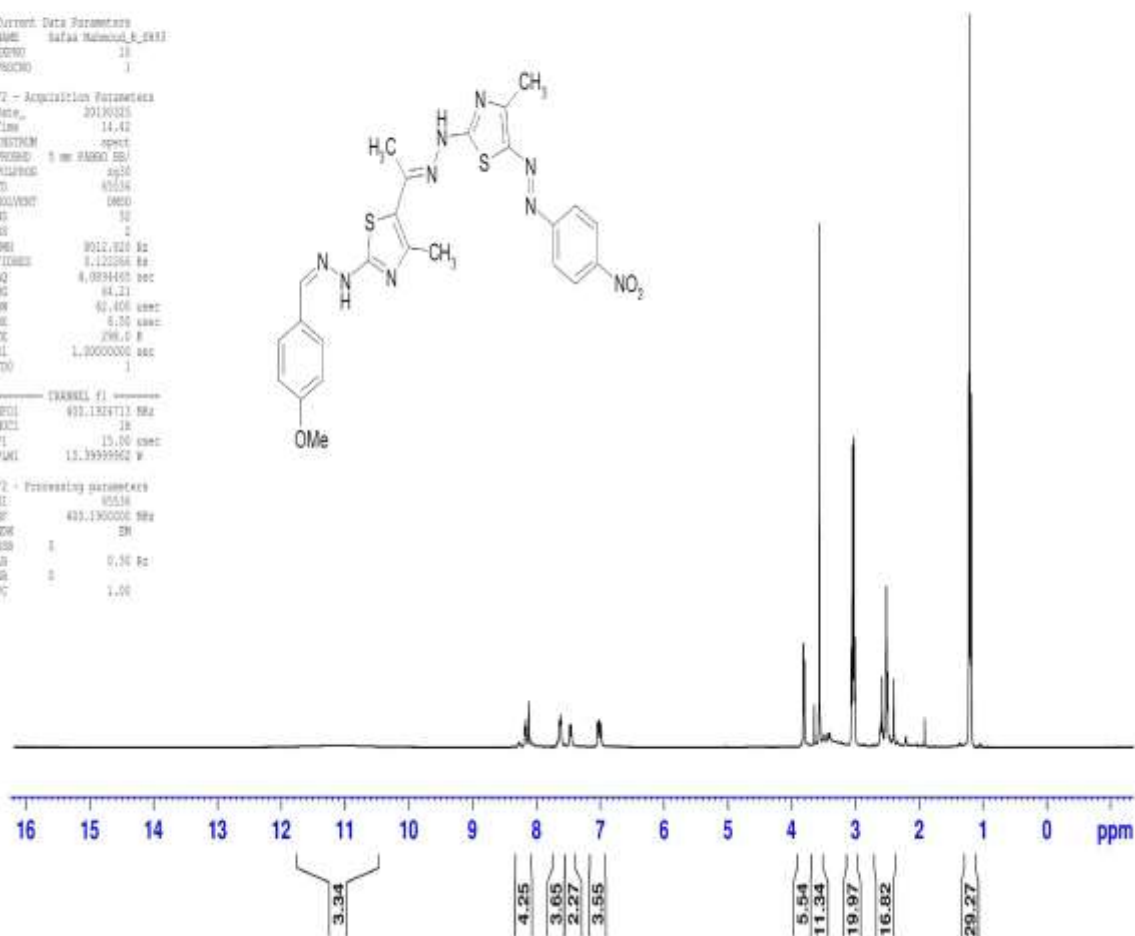

Figure S17. NMR Spectra of compound 10d

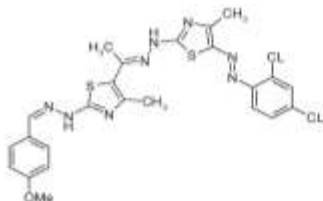

# Cairo University Micro Analytical Center

DI Analysis  
Shimadzu Qp-2010 Plus

Sample Information  
Analyzed by : Dr. Mai Younis  
Analyzed : 01/01/2007 09:33:45  
Sample Name : SH102  
Sample ID :  
Customer Name : Dr. Soloby Goma - Science - Cairo  
Data File : C:\GCMSolution\Data\Project1\SH102.QGD  
Org Data File : C:\GCMSolution\Data\Project1\SH102.QGD  
Method File : C:\GCMSolution\Data\Project1\High Temperature Op  
Org Method File : C:\GCMSolution\Data\Project1\High Temperature Op  
Report File :  
Tuning File : C:\GCMSolution\System\Tune1\default.qgt  
SEnd15 Modified by : Dr. Mai Younis  
Modified : 01/01/2007 09:39:02

Method  
Analytical Line 1  
IonSourceTemp : 250.00 °C  
[MS Table]  
--Group 1 - Event 1--  
Start Time : 0.00min  
End Time : 10.00min  
ACQ Mode : Scan  
Event Time : 0.50sec  
Scan Speed : 1250  
Start m/z : 50.00  
End m/z : 600.00  
Electron Voltage : 70 eV  
Ionization Mode : EI

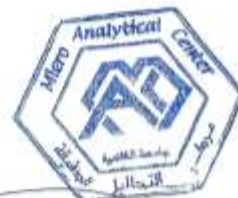

C:\GCMSolution\Data\Project1\SH102.QGD

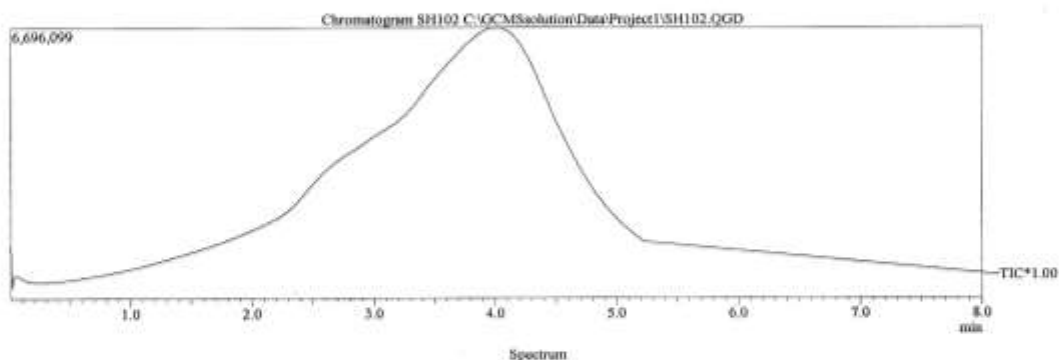

Line# 1 R.Time:4.0(Scan#:480)  
MassPeaks:529  
RawMode:Single 4.0(480) BasePeak:161(196081)  
BG Mode:None Group 1 - Event 1

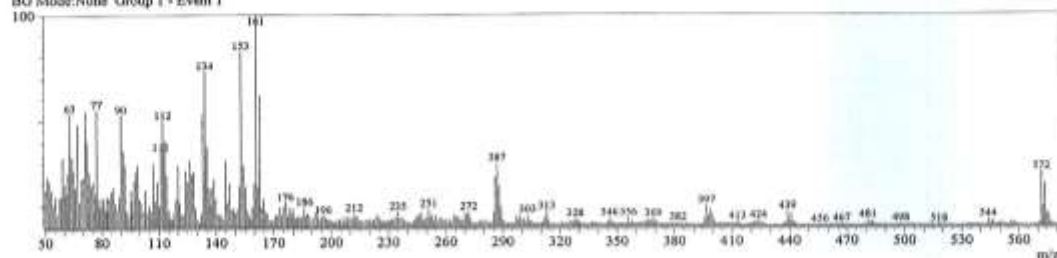

Mass Table  
Line# 1 R.Time:4.0(Scan#:480)  
MassPeaks:529  
RawMode:Single 4.0(480) BasePeak:161(196081)  
BG Mode:None Group 1 - Event 1

| # | m/z   | Abs. Int. | Rel. Int. | # | m/z   | Abs. Int. | Rel. Int. |
|---|-------|-----------|-----------|---|-------|-----------|-----------|
| 1 | 50.05 | 34062     | 17.37     | 4 | 53.05 | 34199     | 17.44     |
| 2 | 51.05 | 45501     | 23.21     | 5 | 54.05 | 20894     | 10.66     |
| 3 | 52.05 | 41835     | 21.34     | 6 | 55.05 | 28031     | 14.30     |
|   |       |           |           | 7 | 56.05 | 10551     | 5.38      |
|   |       |           |           | 8 | 57.05 | 26861     | 13.70     |
|   |       |           |           | 9 | 58.05 | 27539     | 14.04     |

Figure S18. Mass Spectra of compound 10e

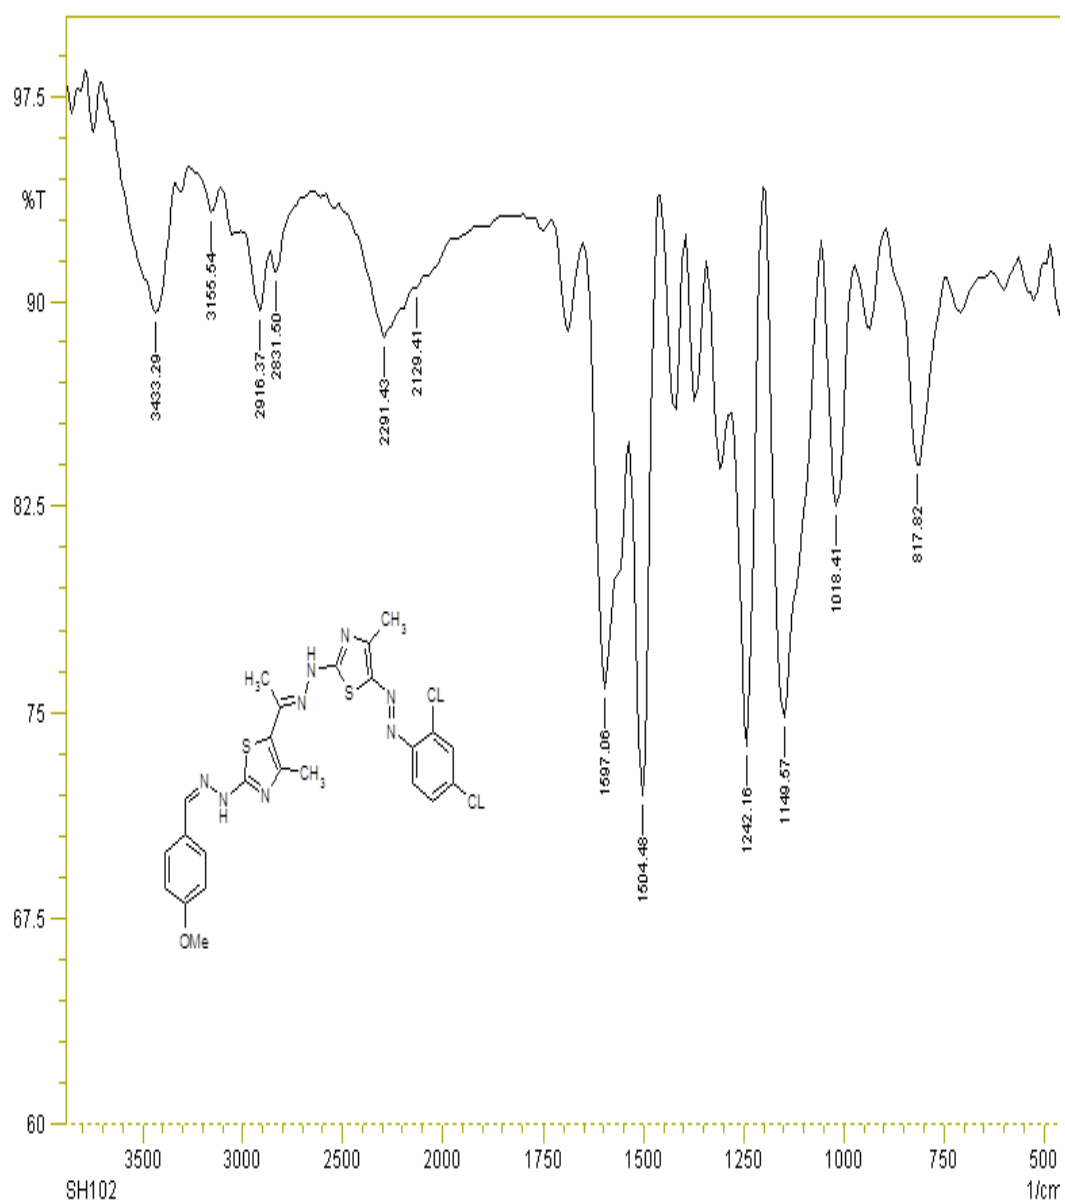

**Figure S19. IR Spectra of compound 10e**

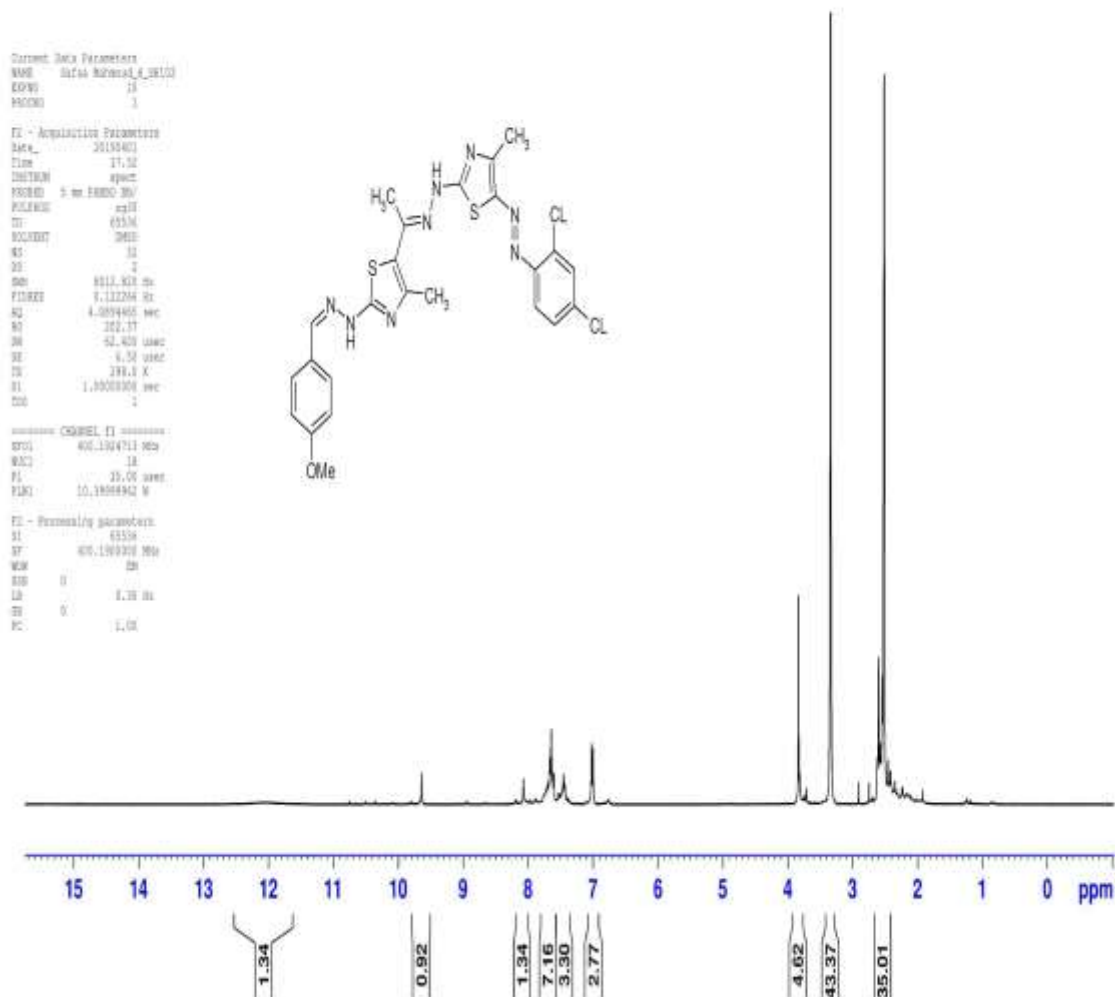

Figure S20. <sup>1</sup>H NMR Spectra of compound 10e

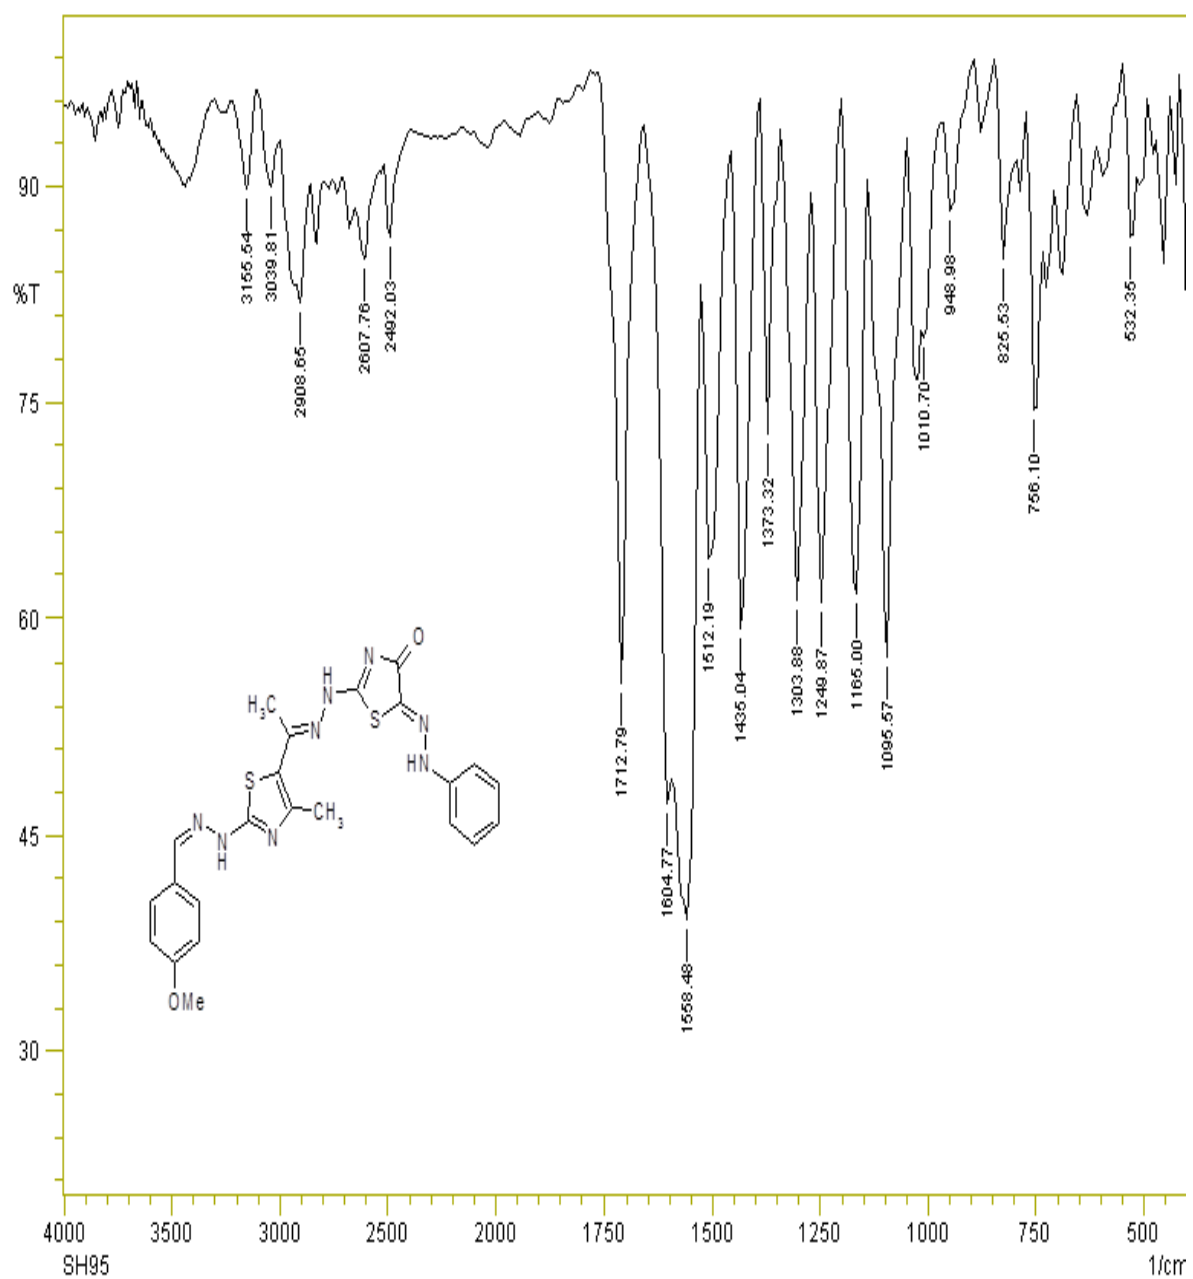

**Figure S21. IR Spectra of compound 13a**

Current Data Parameters  
NAME Safaa Mahmoud\_H\_SH95  
EXPNO 1  
PROCNO 1

F2 - Acquisition Parameters  
Date\_ 20190225  
Time 14.51  
INSTRUM spect  
PROBHD 5 mm PABBO BB/  
PULPROG zgpg30  
TD 65536  
SOLVENT DMSO  
AQ 1.10  
RG 32  
DS 2  
SWH 800.024 Hz  
FIDRES 0.122254 Hz  
AQ 4.084661 sec  
RG 165.46  
BW 62.400 kHz  
GB 0.50 kHz  
TE 298.2 K  
SI 1.0000000 sec  
DSO 1

===== CHANNEL f1 =====  
NUC1 13C  
P1 15.00 kHz  
PL1 0.0000000 W

F2 - Processing parameters  
SI 65536  
SF 400.1460000 MHz  
WDW EM  
SSB 0  
LA 0.00 Hz  
GB 0  
PC 1.00

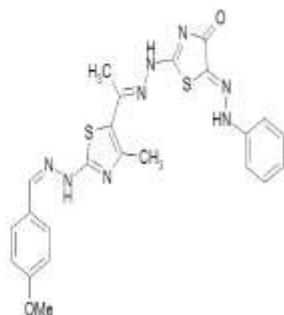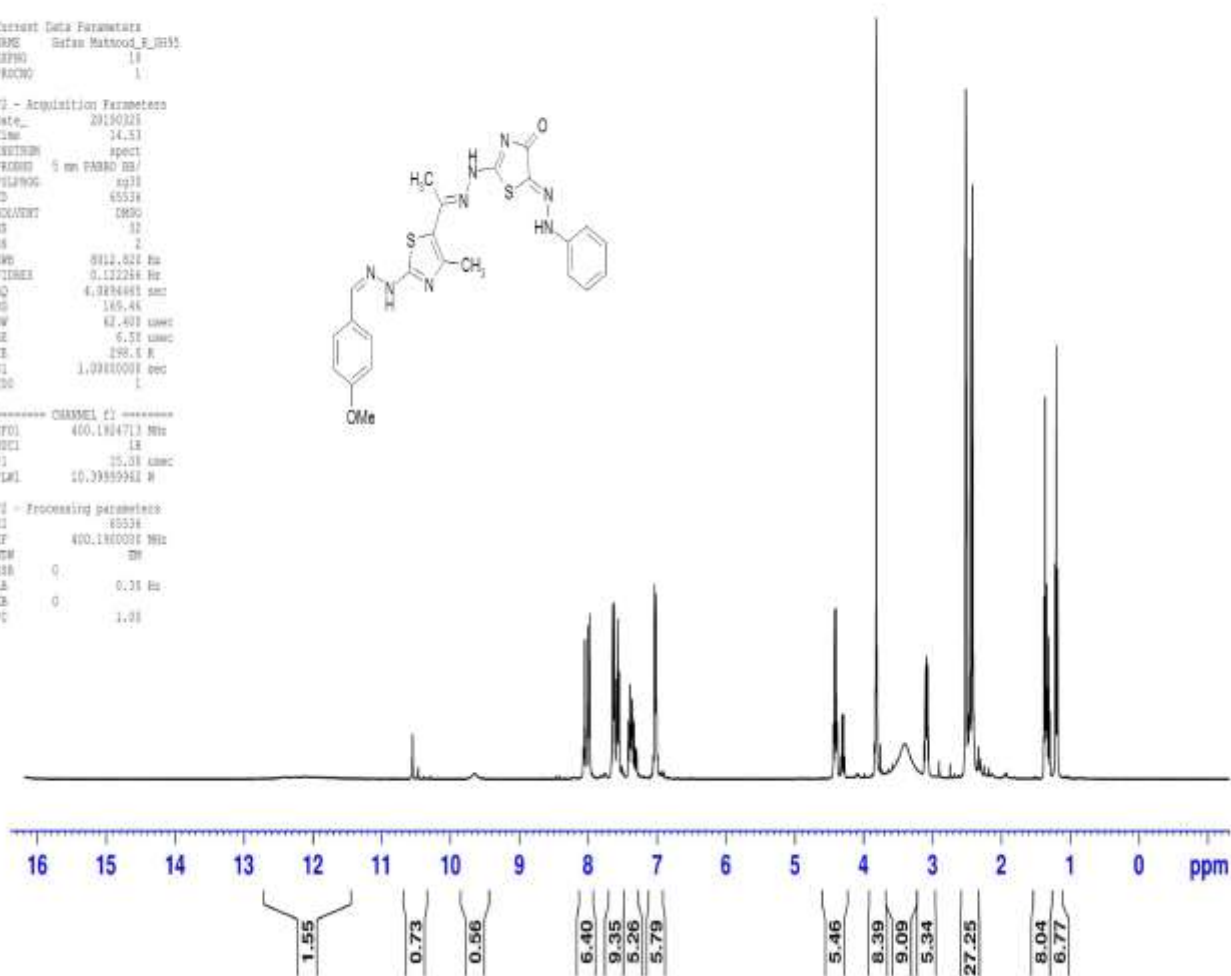

Figure S22. <sup>1</sup>H NMR Spectra of compound 13a



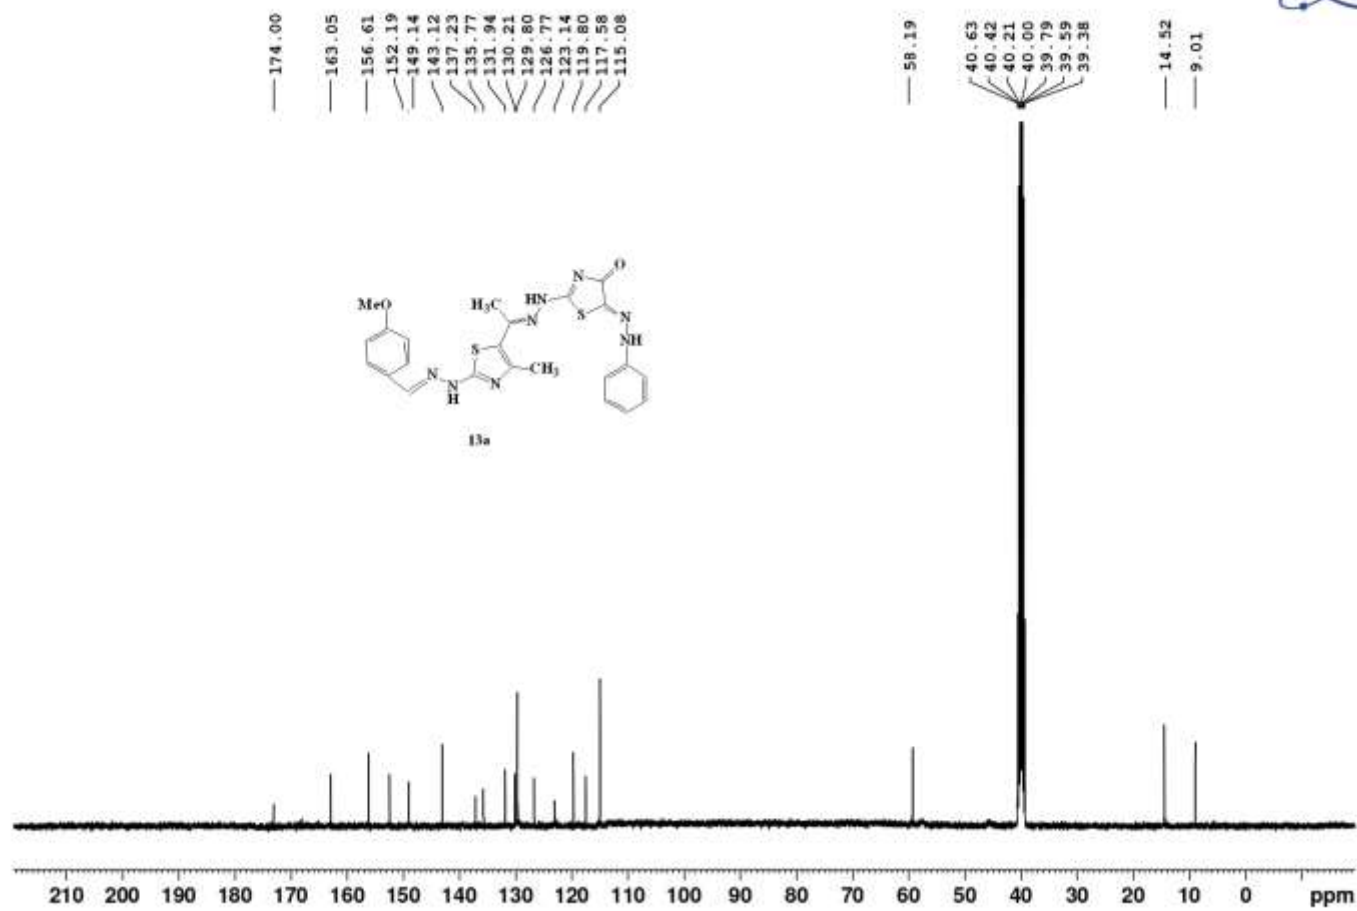

Figure S23. <sup>13</sup>CNMR Spectra of compound 13a

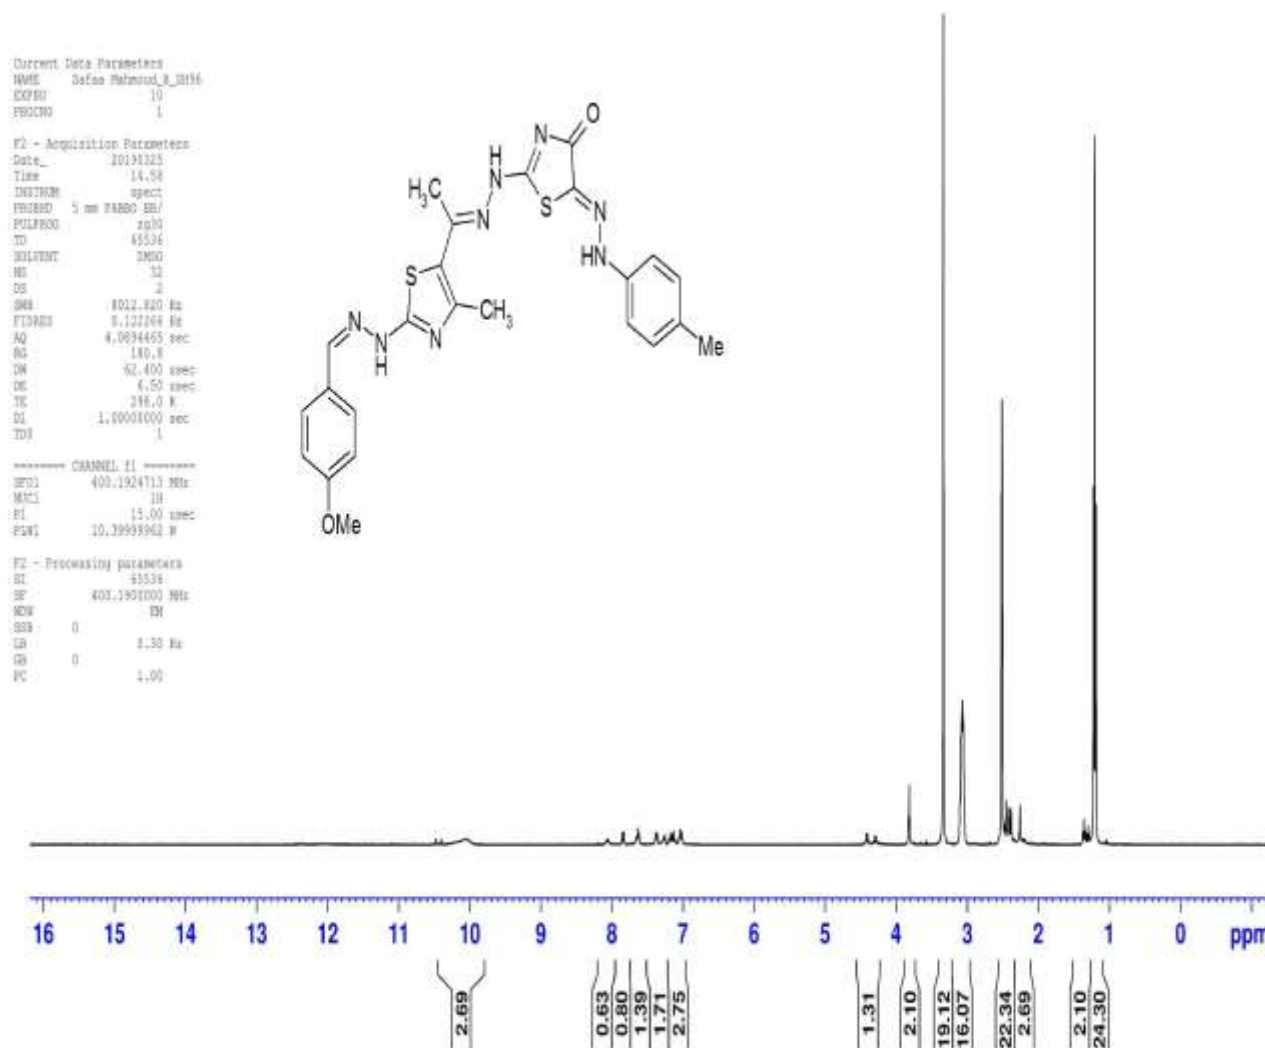Figure S24. <sup>1</sup>H NMR Spectra of compound 13b

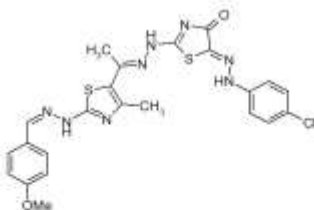

## Cairo University Micro Analytical Center

DI Analysis  
Shimadzu Qp-2010 Plus

Sample Information  
Analyzed by : Dr. Mai Younis  
Analyzed : 01/01/2007 08:50:57  
Sample Name : SH94  
Sample ID :  
Customer Name : Dr. Sobhy Goma - Science - Cairo  
Data File : C:\GCM\Solution\Data\Project1\SH94.QGD  
Org Data File : C:\GCM\Solution\Data\Project1\SH94.QGD  
Method File : C:\GCM\Solution\Data\Project1\High Temperature Op  
Org Method File : C:\GCM\Solution\Data\Project1\High Temperature Op  
Report File :  
Tuning File : C:\GCM\Solution\System1\Tune1\\_default.qst  
SEnd/BModified by : Dr. Mai Younis  
Modified : 01/01/2007 08:56:05

### Method

Analytical Line 1  
IonSource Temp : 250.00 °C  
[MS Table]  
--Group 1 - Event 1--  
Start Time : 0.00min  
End Time : 10.00min  
Scan :  
ACQ Mode :  
Event Time : 0.50sec  
Scan Speed : 1250  
Start m/z : 50.00  
End m/z : 600.00  
Electron Voltage : 70 eV  
Ionization Mode : EI

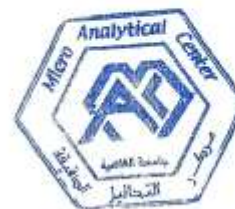

C:\GCM\Solution\Data\Project1\SH94.QGD

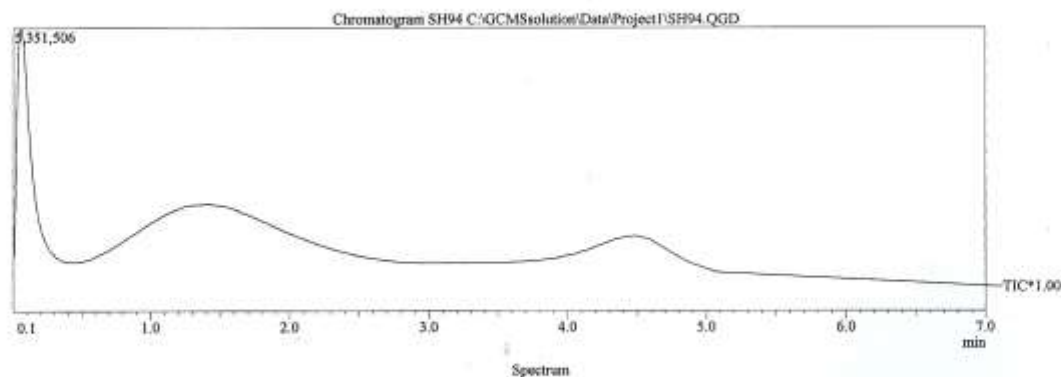

Line#:1 R.Time:4.5(Scan#:539)  
MassPeaks:412  
RawMode:Single 4.5(539) BasePeak:55(35636)  
BG Mode:None Group 1 - Event 1

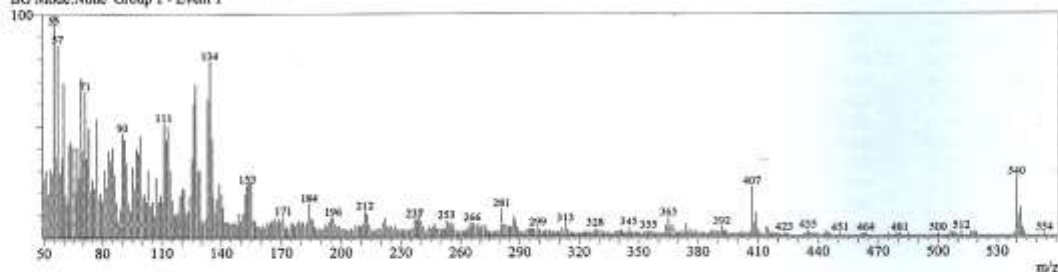

### Mass Table

Line#:1 R.Time:4.5(Scan#:539)

MassPeaks:412

RawMode:Single 4.5(539) BasePeak:55(35636)

BG Mode:None Group 1 - Event 1

| # | m/z   | Abs. In | Rel. Int. | # | m/z   | Abs. In | Rel. Int. | # | m/z   | Abs. In | Rel. Int. |
|---|-------|---------|-----------|---|-------|---------|-----------|---|-------|---------|-----------|
| 1 | 50.00 | 9441    | 26.49     | 4 | 53.05 | 10939   | 30.70     | 7 | 56.05 | 12758   | 35.80     |
| 2 | 51.05 | 10628   | 29.82     | 5 | 54.05 | 10270   | 28.82     | 8 | 57.05 | 30668   | 86.06     |
| 3 | 52.05 | 6961    | 19.53     | 6 | 55.05 | 35636   | 100.00    | 9 | 58.05 | 10337   | 29.01     |

Figure S25 Mass Spectra of compound 13c

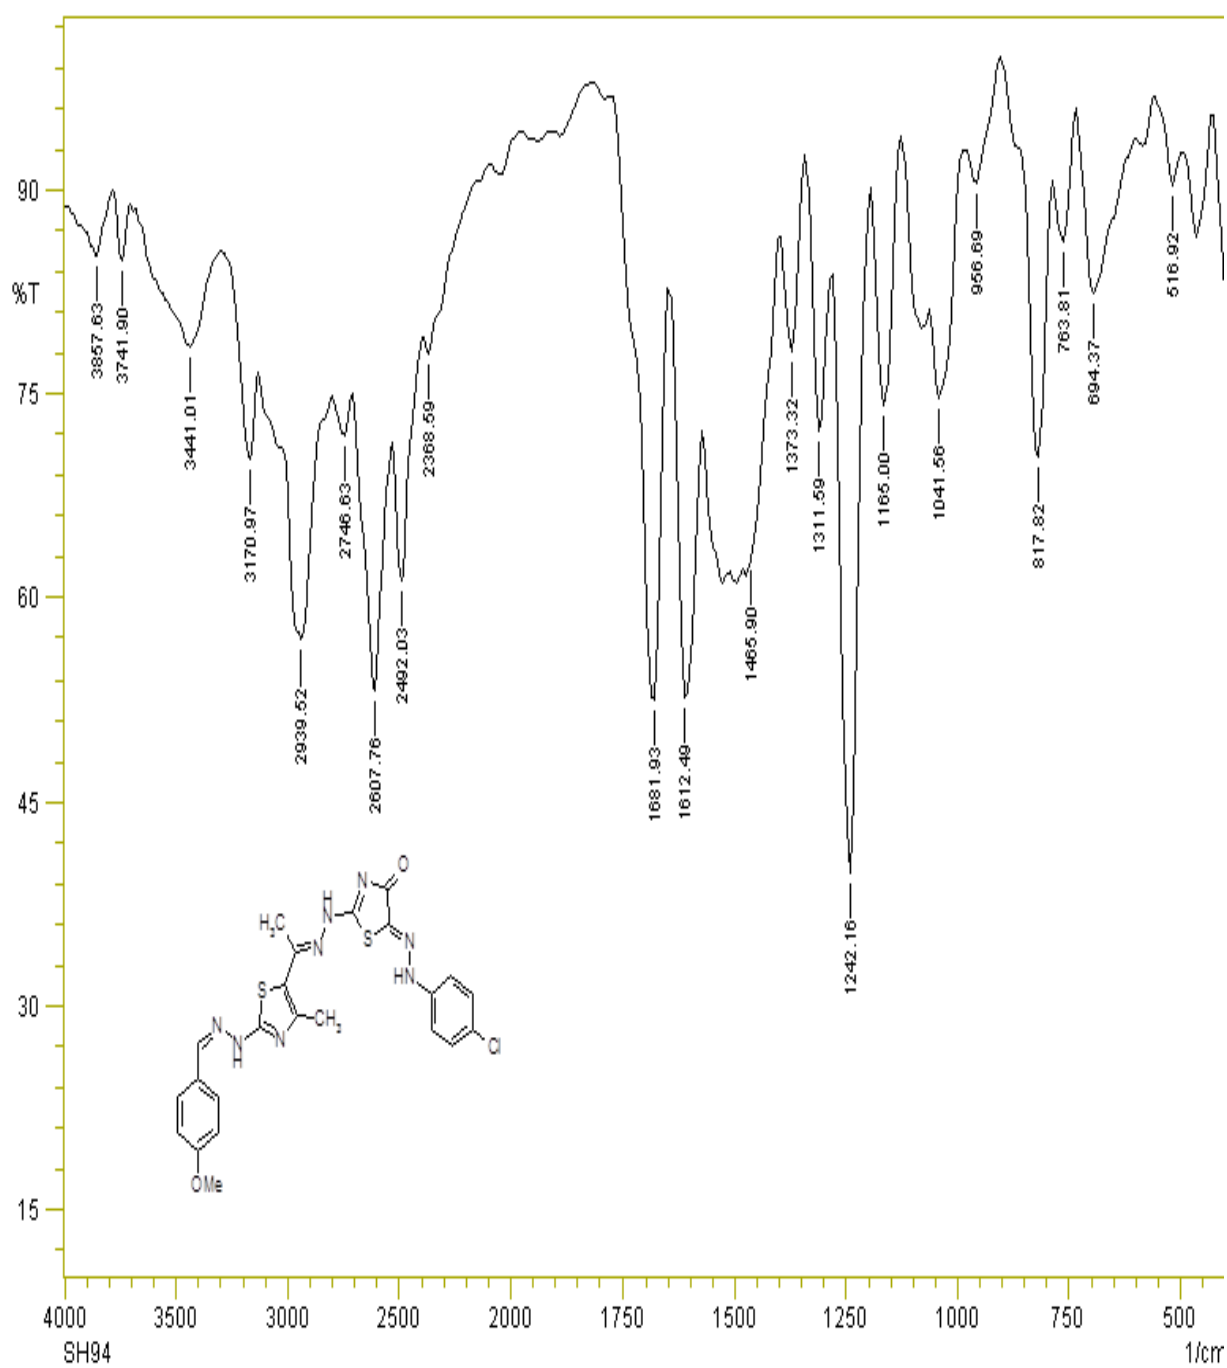

**Figure S26. IR Spectra of compound 13c**

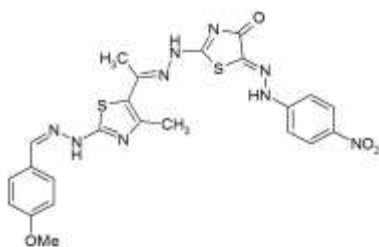

## Cairo University Micro Analytical Center

DI Analysis  
Shimadzu Qp-2010 Plus

Sample Information  
Analyzed by : Dr. Mai Younis  
Analyzed : 01/01/2007 09:21:28  
Sample Name : SH101  
Sample ID :  
Customer Name : Dr. Sobhy Goma - Science - Cairo  
Data File : C:\GCMSolution\Data\Project1\SH101.QGD  
Org Data File : C:\GCMSolution\Data\Project1\SH101.QGD  
Method File : C:\GCMSolution\Data\Project1\High Temperature Op  
Org Method File : C:\GCMSolution\Data\Project1\High Temperature Op  
Report File :  
Tuning File : C:\GCMSolution\System\Tune1\\_default.qgt  
SEndISModified by : Dr. Mai Younis  
Modified : 01/01/2007 09:30:02

### Method

Analytical Line 1  
IonSourceTemp : 250.00 °C  
[MS Table]  
--Group 1 - Event 1--  
Start Time : 0.00min  
End Time : 10.00min  
ACQ Mode : Scan  
Event Time : 0.50sec  
Scan Speed : 1250  
Start m/z : 50.00  
End m/z : 600.00

Electron Voltage : 70 eV  
Ionization Mode : EI

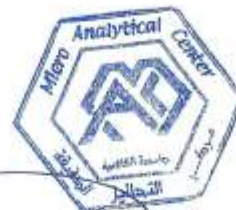

C:\GCMSolution\Data\Project1\SH101.QGD

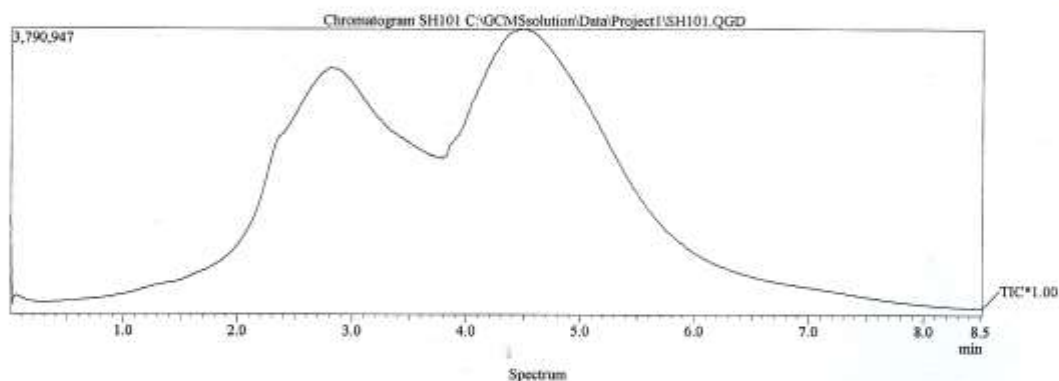

Line#:1 R.Time:3.8(Scan#:456)  
MassPeaks:401  
RawMode:Single 3.8(456) BasePeak:90(60458)  
BG Mode:None Group 1 - Event 1

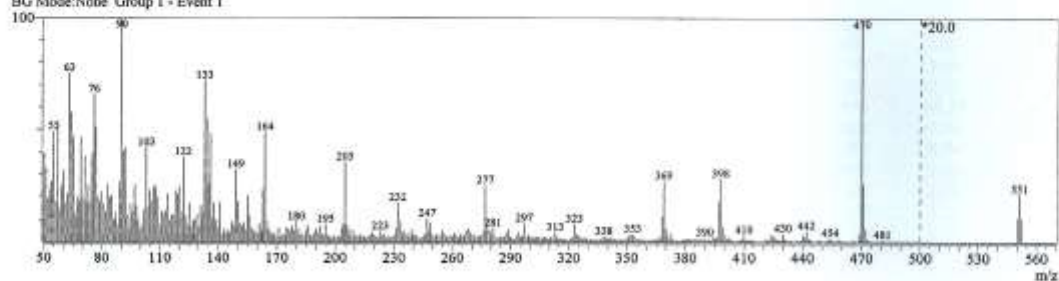

### Mass Table

Line#:1 R.Time:3.8(Scan#:456)

MassPeaks:401

RawMode:Single 3.8(456) BasePeak:90(60458)

BG Mode:None Group 1 - Event 1

| # | m/z   | Abs. Int. | Rel. Int. | # | m/z   | Abs. Int. | Rel. Int. | # | m/z   | Abs. Int. | Rel. Int. |
|---|-------|-----------|-----------|---|-------|-----------|-----------|---|-------|-----------|-----------|
| 1 | 50.00 | 23729     | 39.25     | 4 | 53.05 | 13846     | 22.90     | 7 | 56.10 | 10561     | 17.47     |
| 2 | 51.00 | 19703     | 32.59     | 5 | 54.00 | 16124     | 26.67     | 8 | 57.05 | 30814     | 50.97     |
| 3 | 52.05 | 11438     | 18.92     | 6 | 55.05 | 29574     | 48.92     | 9 | 58.05 | 8809      | 14.57     |

Figure S27. Mass Spectra of compound 13d

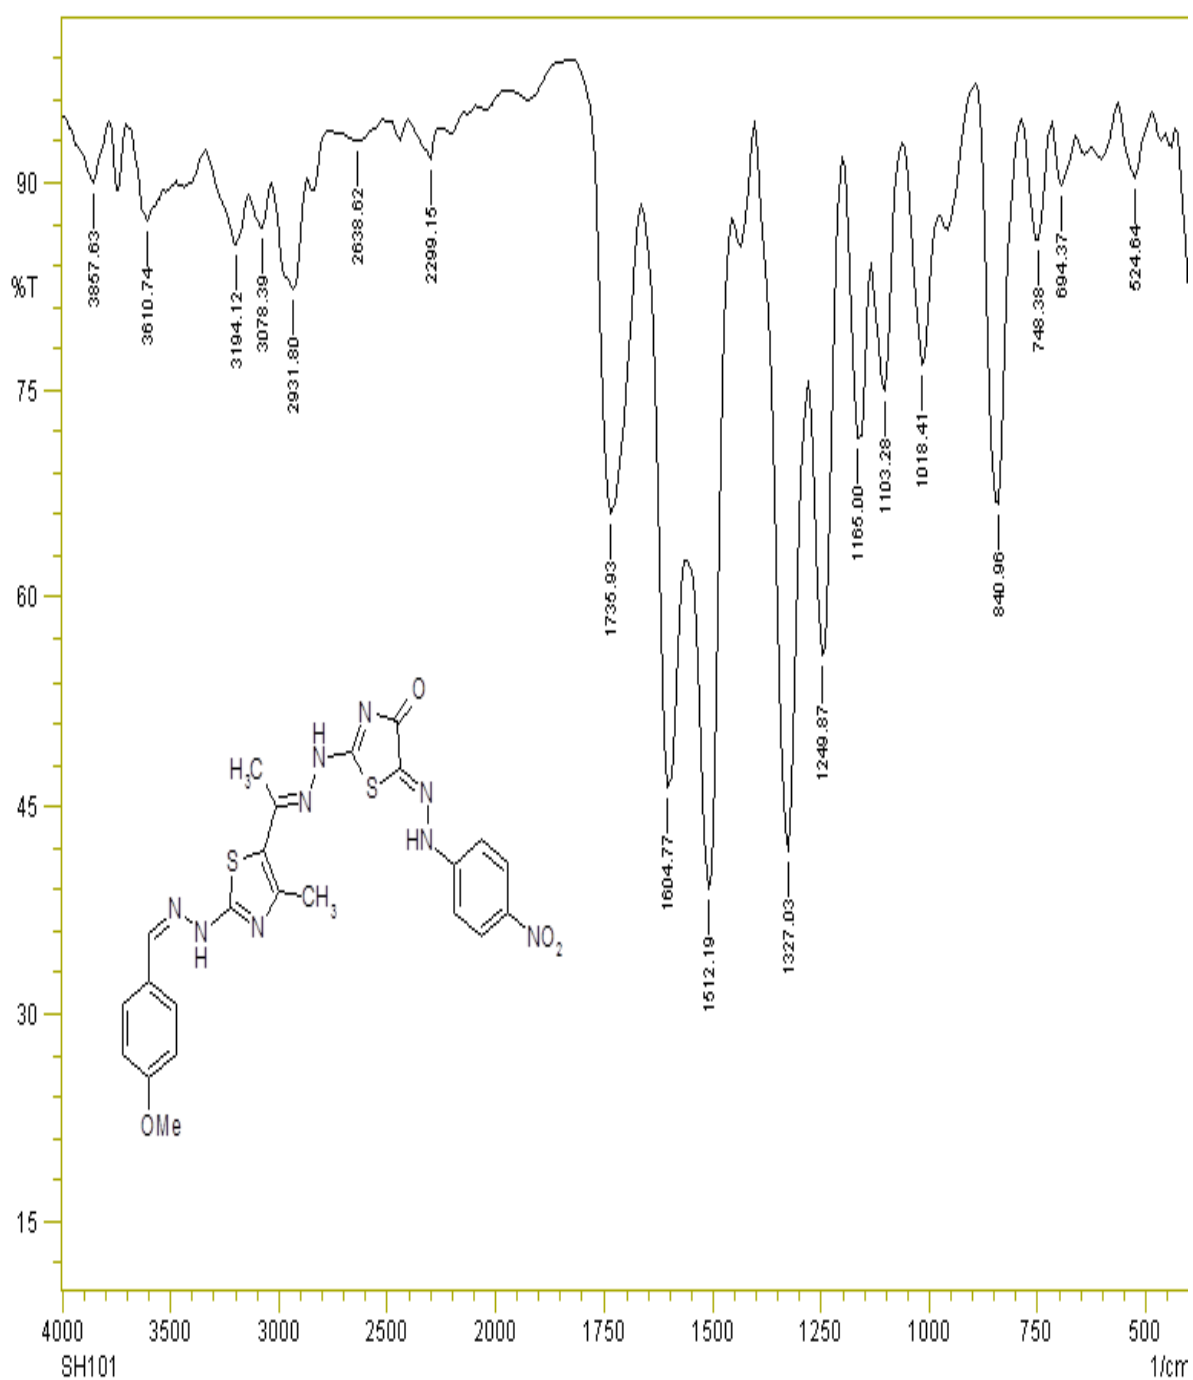

Figure S28. IR Spectra of compound 13d

Current Data Parameters  
NAME: Safaa Mahmoud\_H\_SH101  
EXPNO: 12  
PROCNO: 1

F2 - Acquisition Parameters  
Date\_: 20190401  
Time: 17.27  
INSTRUM: spect  
PROBHD: 5 mm PABBO BB/  
PULPROG: zg30  
TD: 65536  
SOLVENT: DMSO  
NS: 32  
DS: 2  
SWH: 5012.820 Hz  
FIDRES: 0.122766 Hz  
AQ: 4.0894400 sec  
RG: 128.47  
SN: 62.410 dB  
DS: 9.10 dB  
TS: 298.0 K  
D1: 1.0000000 sec  
DQ: 1

===== CHANNEL F1 =====  
NUC1: 13C, 101.62613 MHz  
P1: 13.00 dB  
PL1: 10.0000000 W

F2 - Processing parameters  
SI: 32768  
SF: 400.1901000 MHz  
WDW: EM  
SSB: 0  
LB: 0.10 Hz  
GB: 0  
PC: 1.00

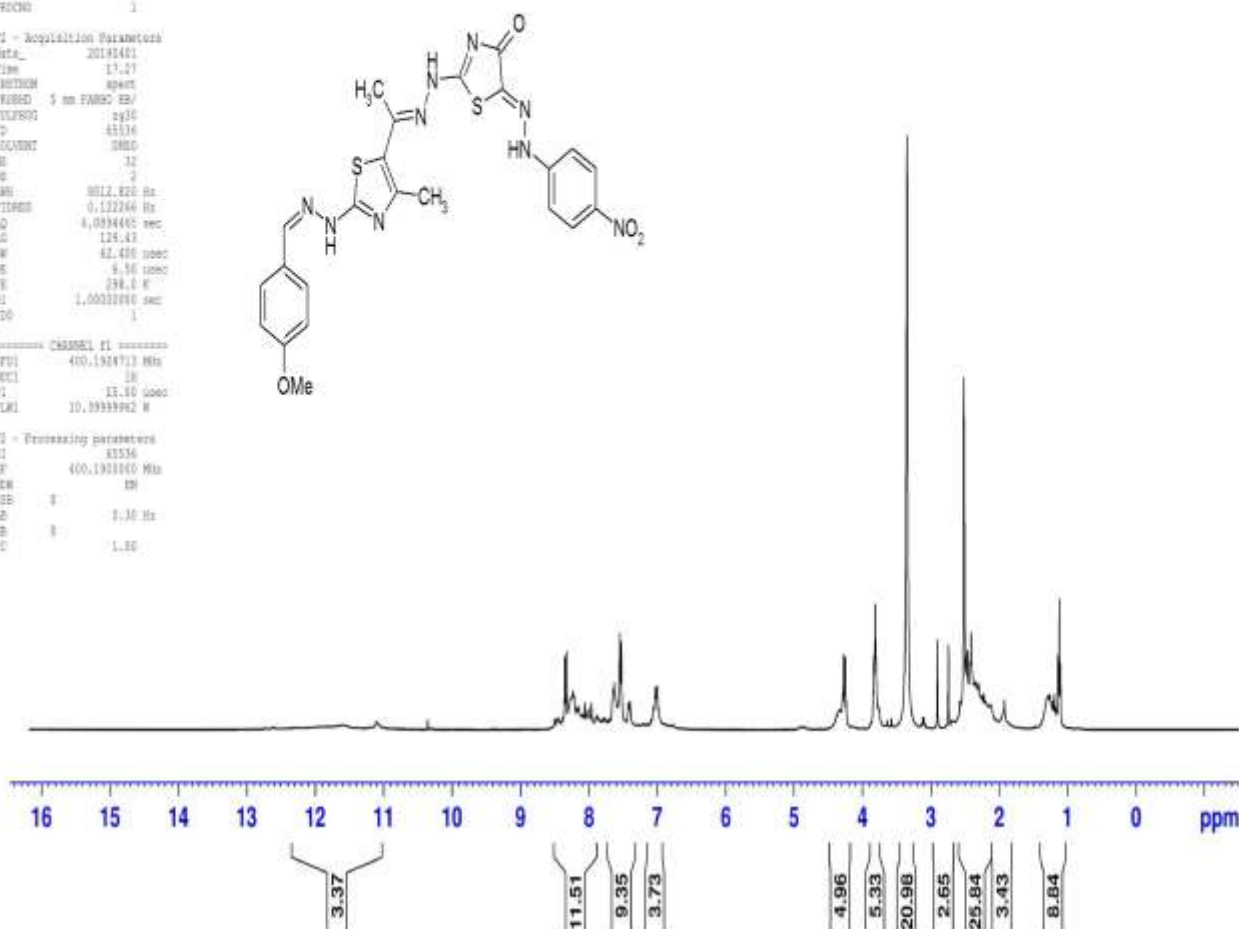

Figure S29. <sup>1</sup>H NMR Spectra of compound 13d

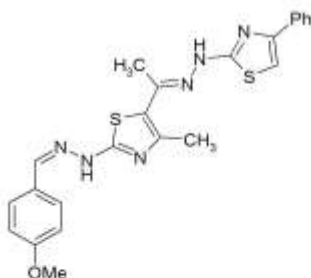

# Cairo University Micro Analytical Center

DI Analysis  
Shimadzu Qp-2010 Plus

Sample Information  
Analyzed by : Dr. Mai Younis  
Analyzed : 01/01/2007 09:06:14  
Sample Name : SH99  
Sample ID :  
Customer Name : Dr. Sobhy Goma - Science - Cairo  
Data File : C:\GCMSolution\Data\Project1\SH99.QGD  
Org Data File : C:\GCMSolution\Data\Project1\SH99.QGD  
Method File : C:\GCMSolution\Data\Project1\High Temperature Op  
Org Method File : C:\GCMSolution\Data\Project1\High Temperature Op  
Report File :  
Tuning File : C:\GCMSolution\System\Tune1\\_default.qgt  
SEndItModified by : Dr. Mai Younis  
Modified : 01/01/2007 09:09:51

Method  
Analytical Line 1  
IonSourceTemp : 250.00 °C  
[MS Table]  
--Group 1 - Event 1--  
Start Time : 0.00min  
End Time : 10.00min  
Scan :  
ACQ Mode :  
Event Time : 0.50sec  
Scan Speed : 1250  
Start m/z : 50.00  
End m/z : 600.00  
Electron Voltage : 70 eV  
Ionization Mode : EI

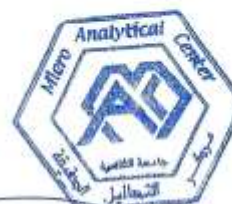

Handwritten signature and initials in blue ink.

C:\GCMSolution\Data\Project1\SH99.QGD

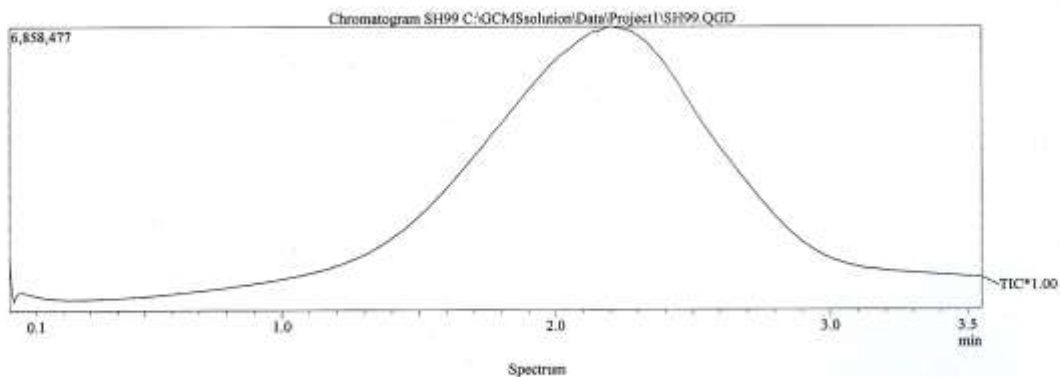

Line#1 R.Time:2.2(Scan#:267)  
MassPeaks:376  
RawMode:Single 2.2(267) BasePeak:134(509711)  
BG Mode:None Group 1 - Event 1

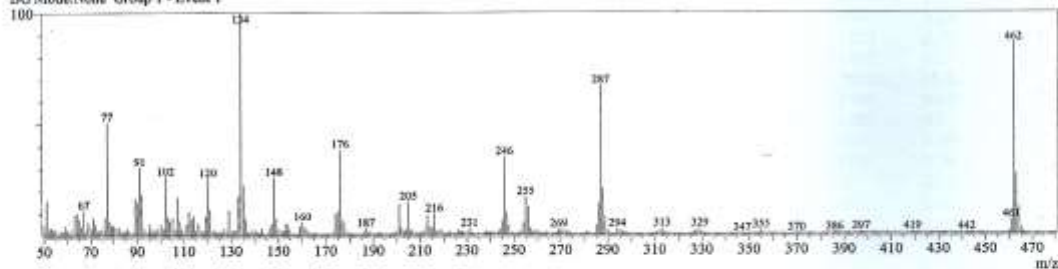

Mass Table  
Line#1 R.Time:2.2(Scan#:267)  
MassPeaks:376  
RawMode:Single 2.2(267) BasePeak:134(509711)  
BG Mode:None Group 1 - Event 1

| # | m/z   | Abs. In | Rel. Int. | # | m/z   | Abs. In | Rel. Int. | # | m/z   | Abs. In | Rel. Int. |
|---|-------|---------|-----------|---|-------|---------|-----------|---|-------|---------|-----------|
| 1 | 50.00 | 23529   | 4.62      | 4 | 53.05 | 17845   | 3.50      | 7 | 56.05 | 4171    | 0.82      |
| 2 | 51.00 | 78679   | 15.44     | 5 | 54.05 | 11917   | 2.34      | 8 | 57.05 | 10513   | 2.06      |
| 3 | 52.05 | 15268   | 3.00      | 6 | 55.05 | 13808   | 2.71      | 9 | 58.00 | 9826    | 1.93      |

Figure S30. Mass Spectra of compound 16



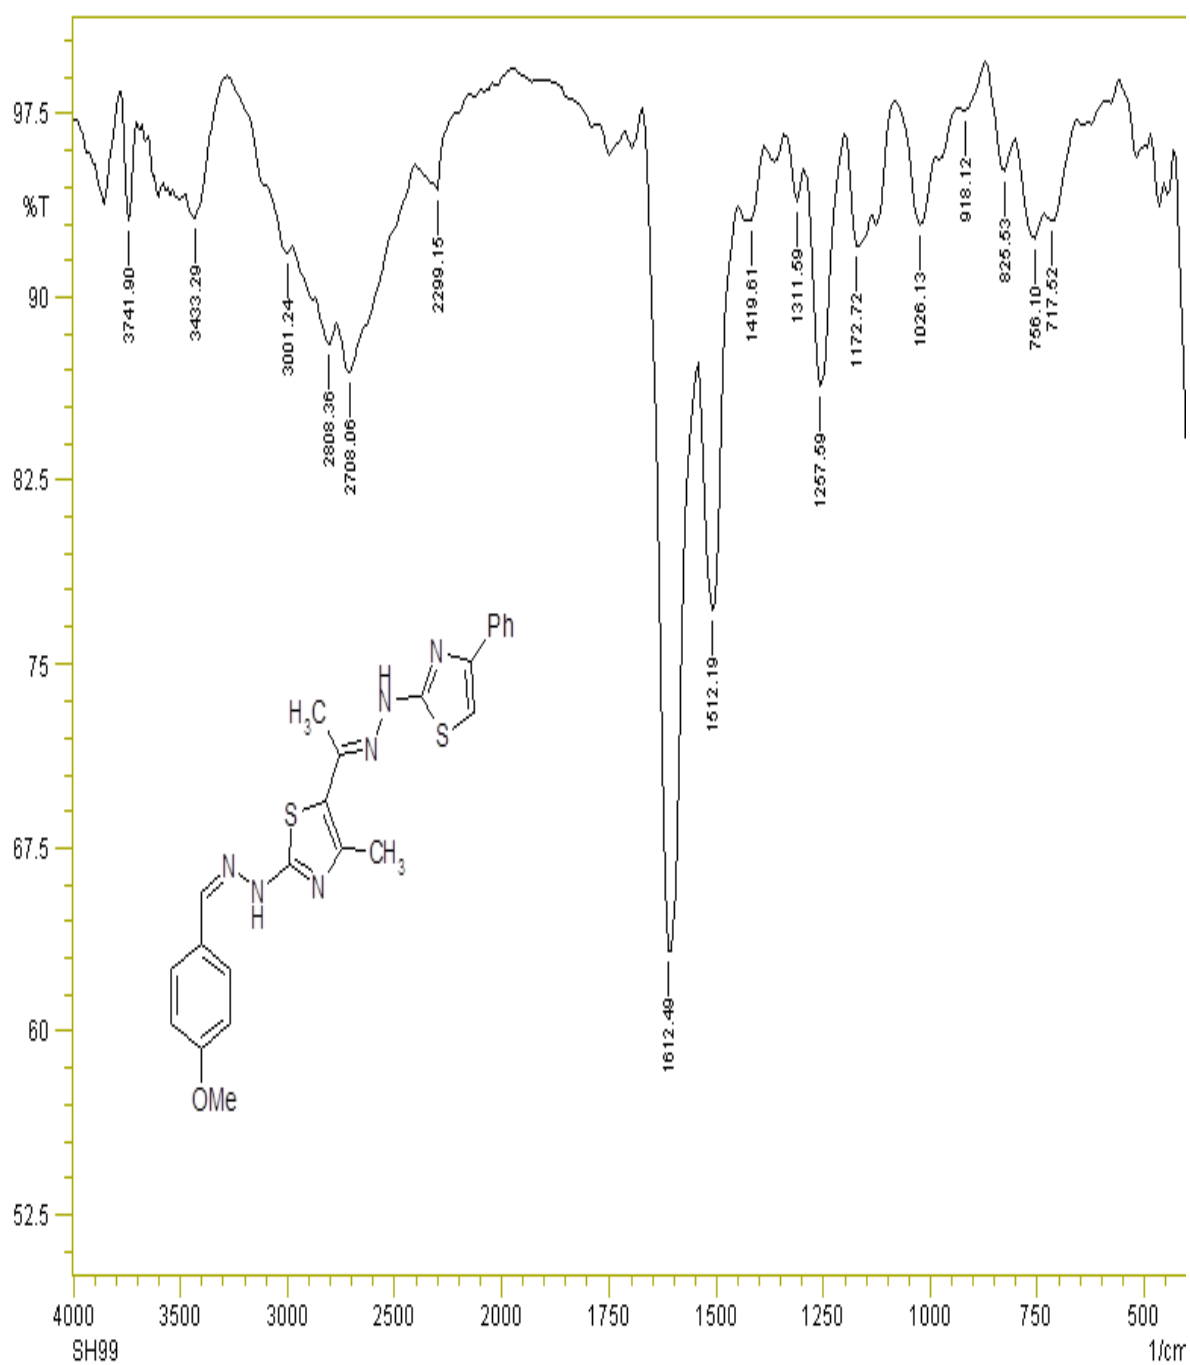

**Figure S31. IR Spectra of compound 16**

Current Data Parameters  
NAME Safaa Mahmoud\_H\_SH99  
EXPNO 10  
PROCNO 1

F2 - Acquisition Parameters  
Date\_ 20150225  
Time 15:08  
INSTRUM spect  
PROBHD 5 mm PABBO BB1  
PULPROG zgpg30  
TD 65536  
SOLVENT DMSO  
NS 2  
DS 2  
SWH 8912.620 Kz  
FIDRES 0.122264 Hz  
AQ 6.0194463 sec  
RG 146.04  
DM 62.400 umsec  
DE 6.30 umsec  
TE 298.0 K  
D1 1.0000000 sec  
TDS 1

===== CHANNEL F1 =====  
NUC1 400.1524713 MHz  
P1 15.00 umsec  
PL1 0.39999962 W

F2 - Processing parameters  
SI 32768  
SF 400.1524713 MHz  
WDW EM  
SSB 0  
LB 0.30 Kz  
GB 0  
PC 1.00

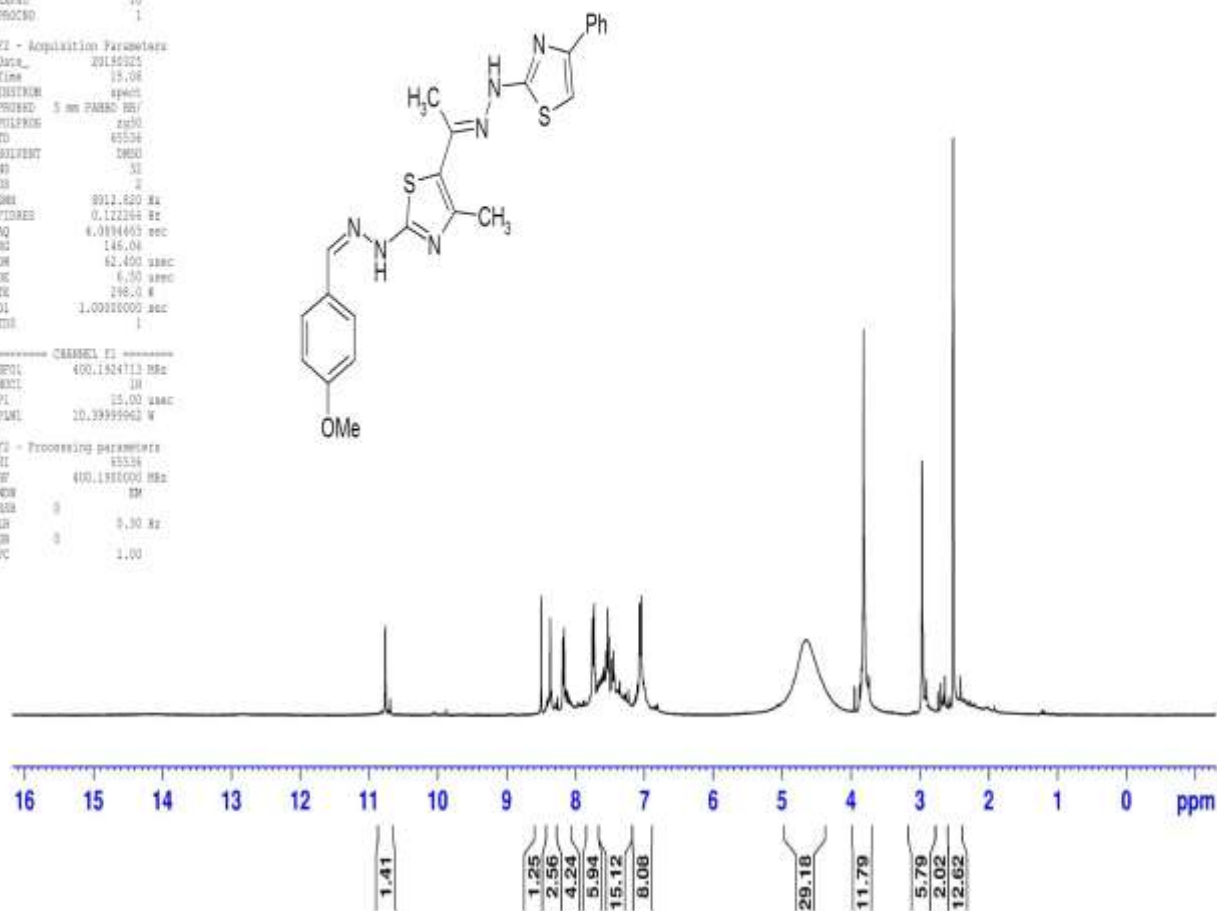

Figure S32. <sup>1</sup>H NMR Spectra of compound 16

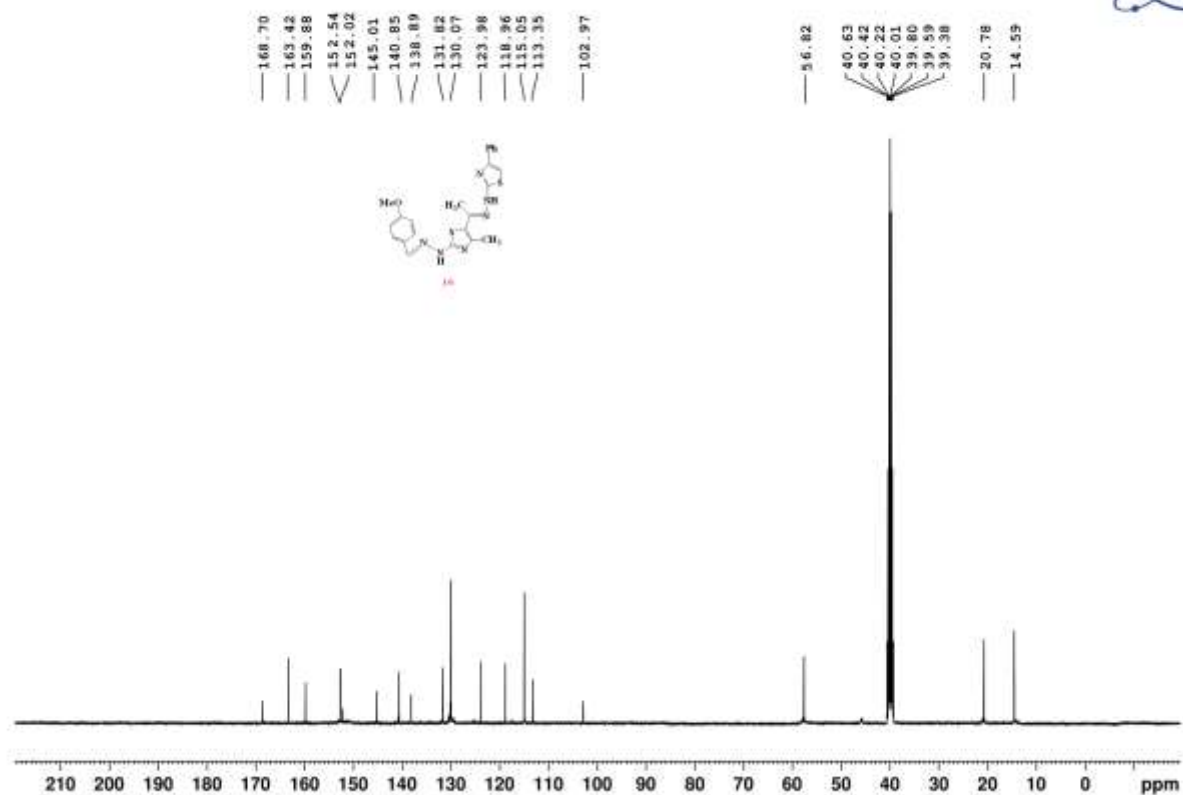

Figure S33. <sup>13</sup>CNMR Spectra of compound 16

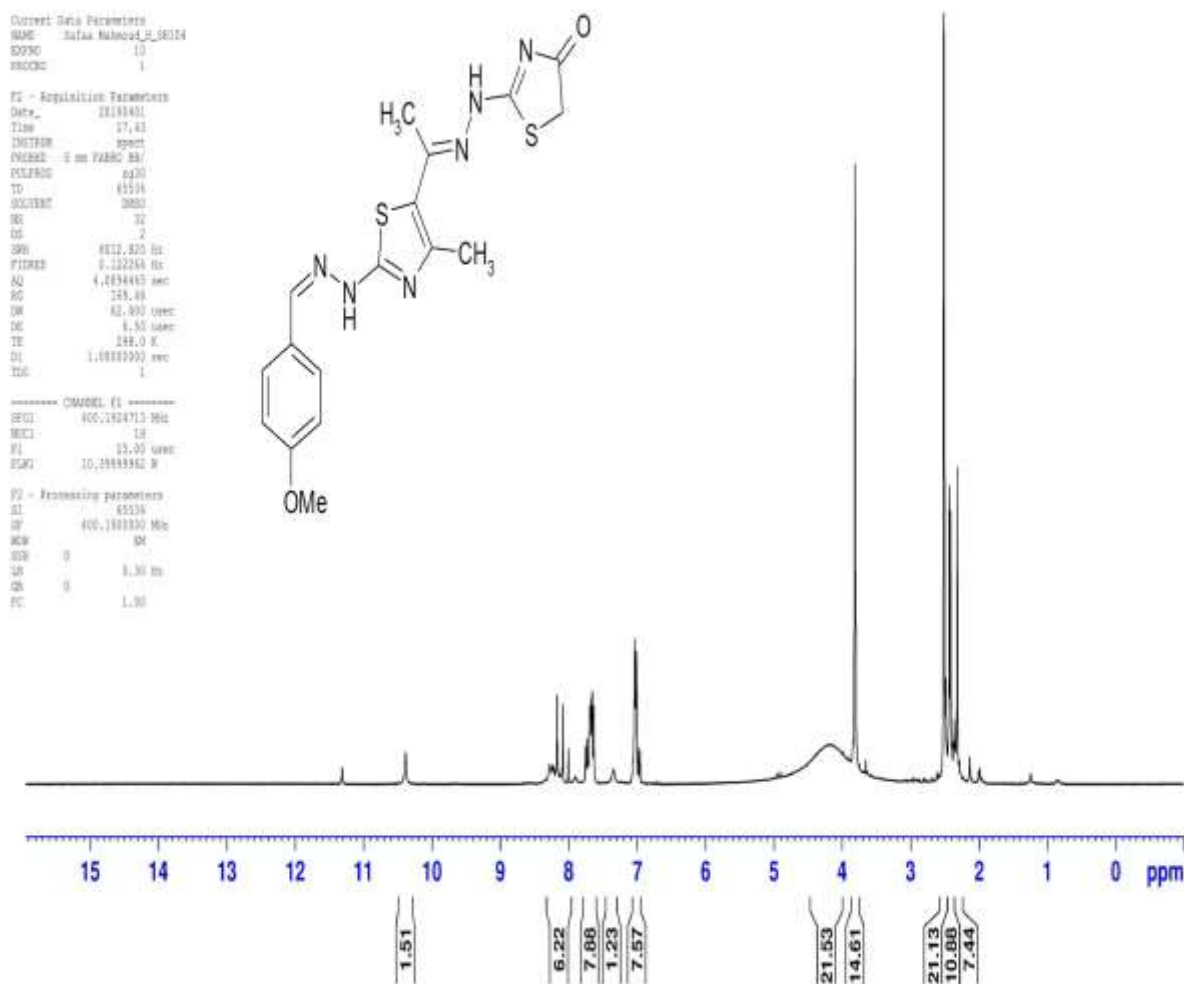Figure S34. <sup>1</sup>H NMR Spectra of compound 18

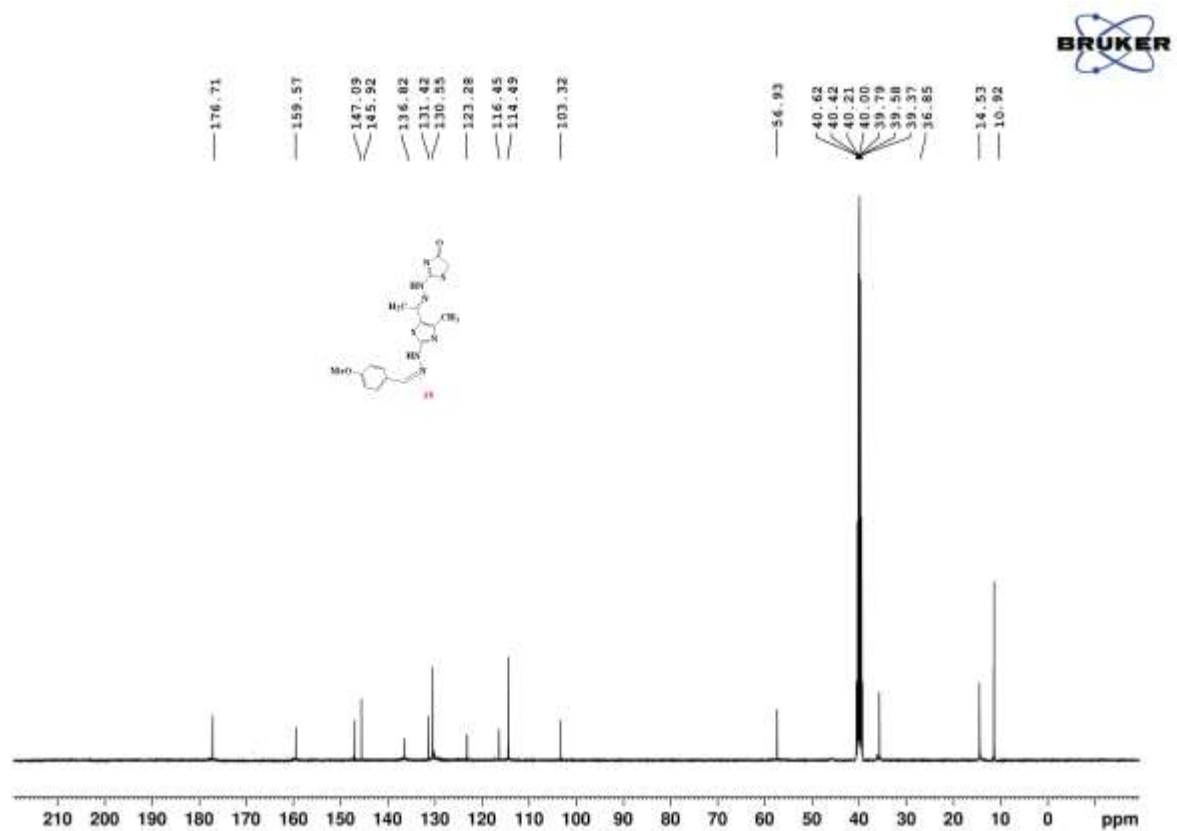

Figure S35. <sup>13</sup>CNMR Spectra of compound 18

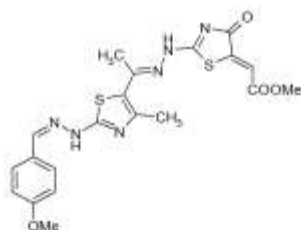

# Cairo University Micro Analytical Center

DI Analysis  
Shimadzu Qp-2010 Plus

Sample Information  
Analyzed by : Dr. Mai Younis  
Analyzed : 01/01/2007 09:41:15  
Sample Name : SH105  
Sample ID :  
Customer Name : Dr. Sobhy Goma - Science - Cairo  
Data File : C:\GCMSsolution\Data\Project1\SH105.QGD  
Org Data File : C:\GCMSsolution\Data\Project1\SH105.QGD  
Method File : C:\GCMSsolution\Data\Project1\High Temperature Op  
Org Method File : C:\GCMSsolution\Data\Project1\High Temperature Op  
Report File :  
Tuning File : C:\GCMSsolution\System\Tune1\\_default.qgt  
\$EndIf\$Modified by : Dr. Mai Younis  
Modified : 01/01/2007 09:48:04

Method  
Analytical Line 1  
IonSourceTemp : 250.00 °C  
[MS Table]  
--Group 1 - Event 1--  
Start Time : 0.00min  
End Time : 10.00min  
ACQ Mode : Scan  
Event Time : 0.50sec  
Scan Speed : 1250  
Start m/z : 50.00  
End m/z : 600.00  
Electron Voltage : 70 eV  
Ionization Mode : EI

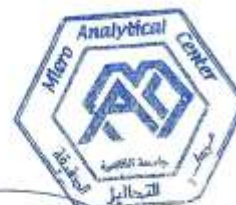

C:\GCMSsolution\Data\Project1\SH105.QGD

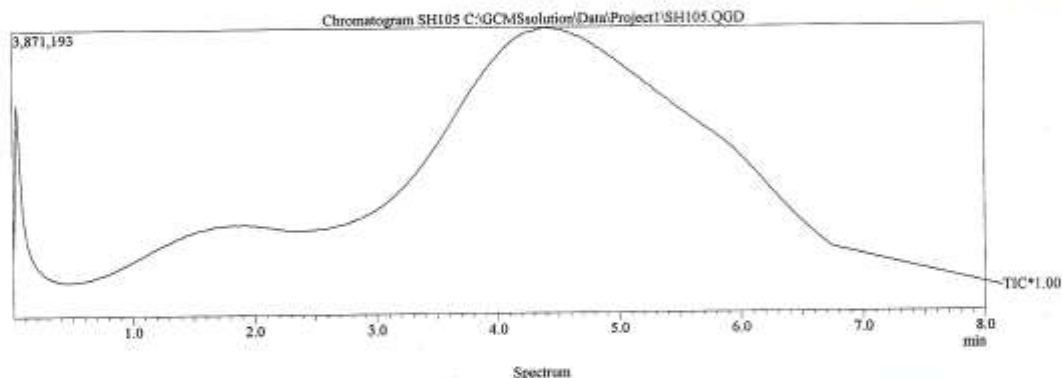

Line# 1 R.Time:4.6(Scan#:553)  
MassPeaks:401  
RawMode:Single 4.6(553) BasePeak:133(140068)  
BG Mode:None Group 1 - Event 1

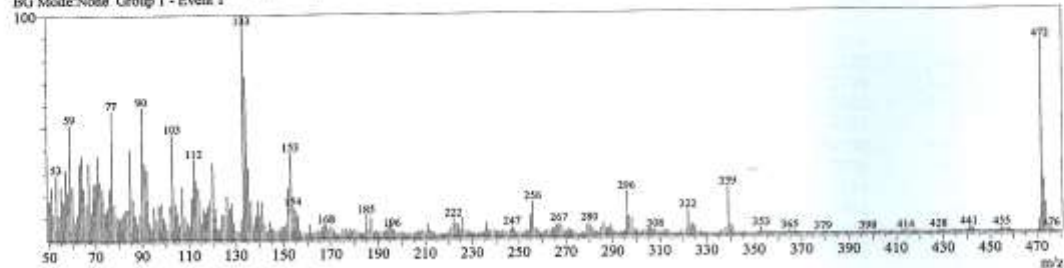

Mass Table

Line# 1 R.Time:4.6(Scan#:553)

MassPeaks:401

RawMode:Single 4.6(553) BasePeak:133(140068)

BG Mode:None Group 1 - Event 1

| # | m/z   | Abs. In | Rel. Int. | # | m/z   | Abs. In | Rel. Int. | # | m/z   | Abs. In | Rel. Int. |
|---|-------|---------|-----------|---|-------|---------|-----------|---|-------|---------|-----------|
| 1 | 50.05 | 24167   | 17.25     | 4 | 53.05 | 40257   | 28.74     | 7 | 56.05 | 23846   | 17.02     |
| 2 | 51.05 | 32810   | 23.42     | 5 | 54.05 | 15261   | 10.90     | 8 | 57.05 | 43515   | 31.07     |
| 3 | 52.05 | 16005   | 11.43     | 6 | 55.05 | 33204   | 23.71     | 9 | 58.05 | 29811   | 21.28     |

Figure S36. Mass Spectra of compound 20

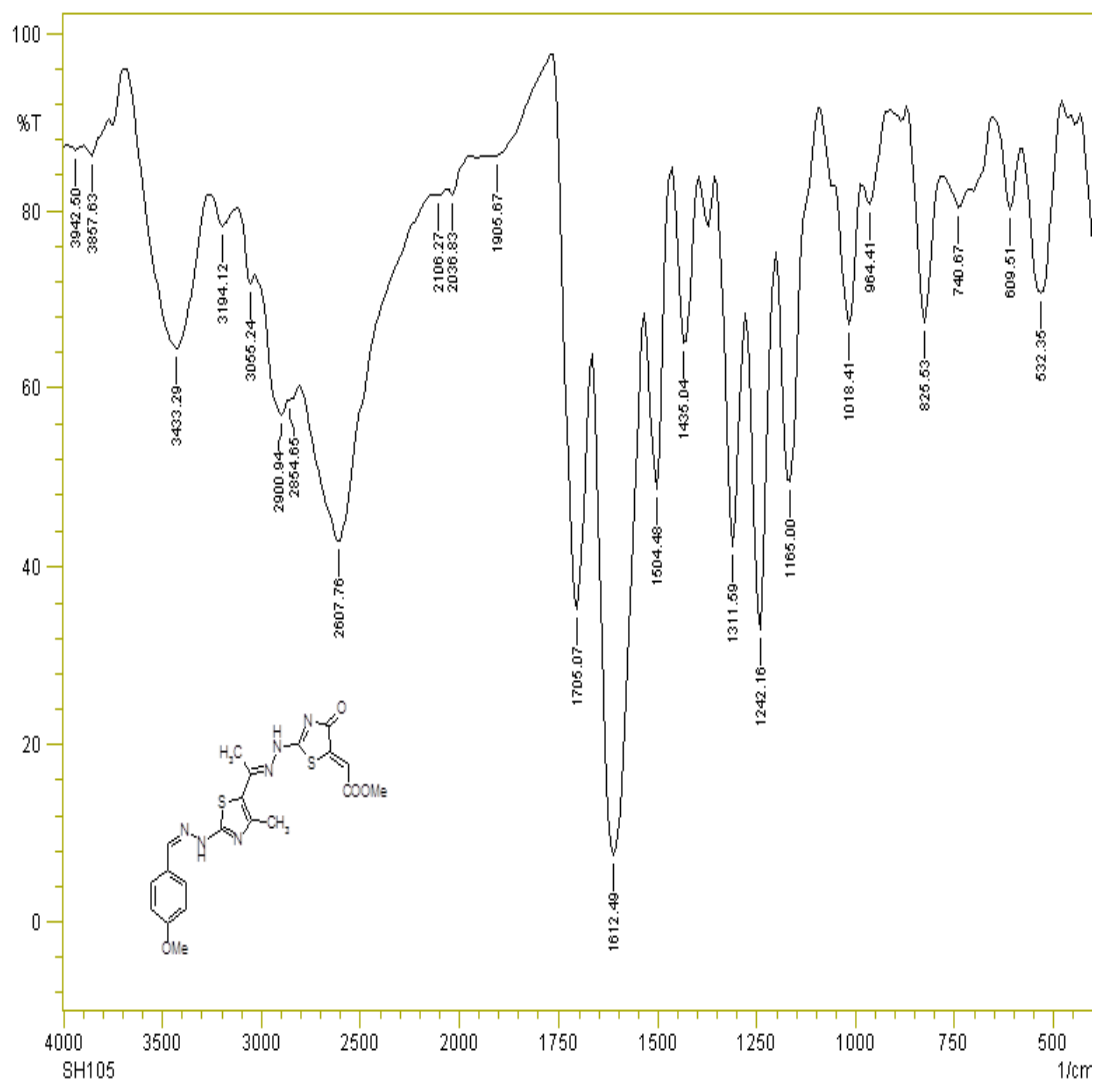

**Figure S37. IR Spectra of compound 20**

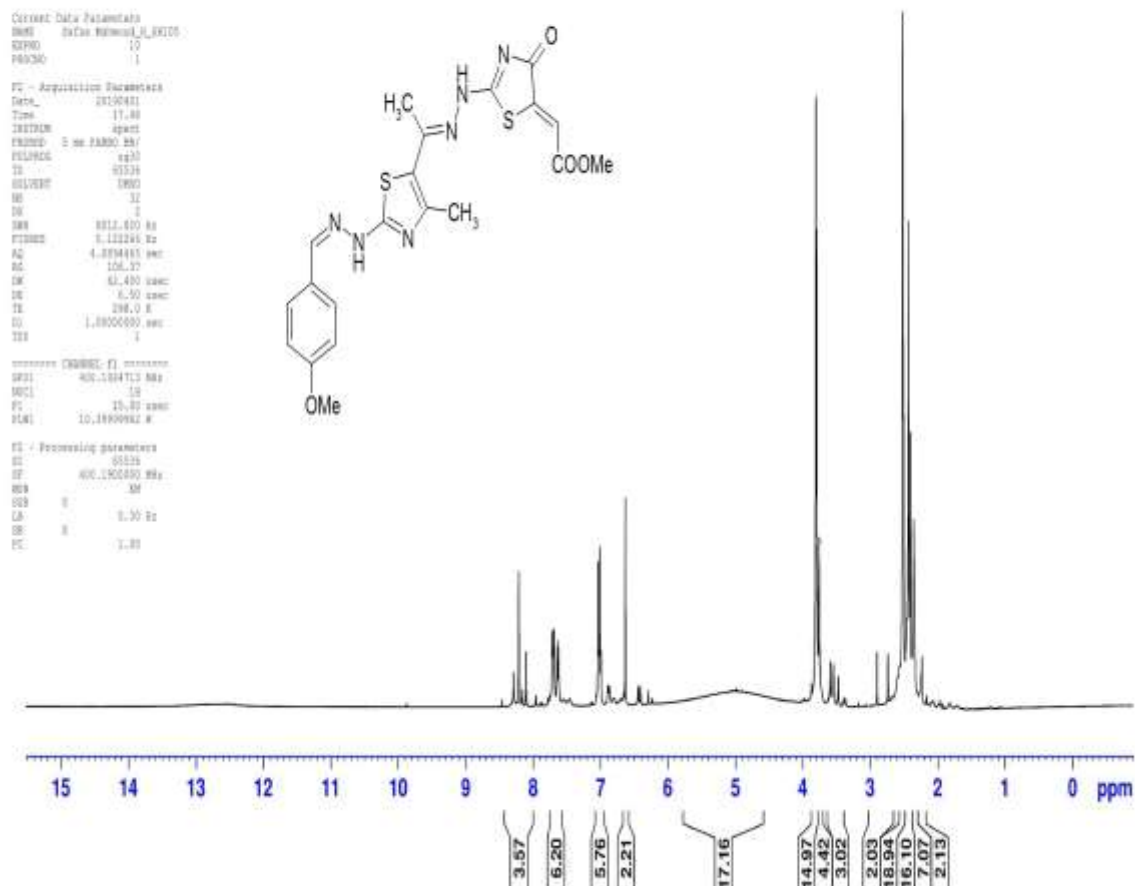Figure S38. <sup>1</sup>HNMR Spectra of compound 20



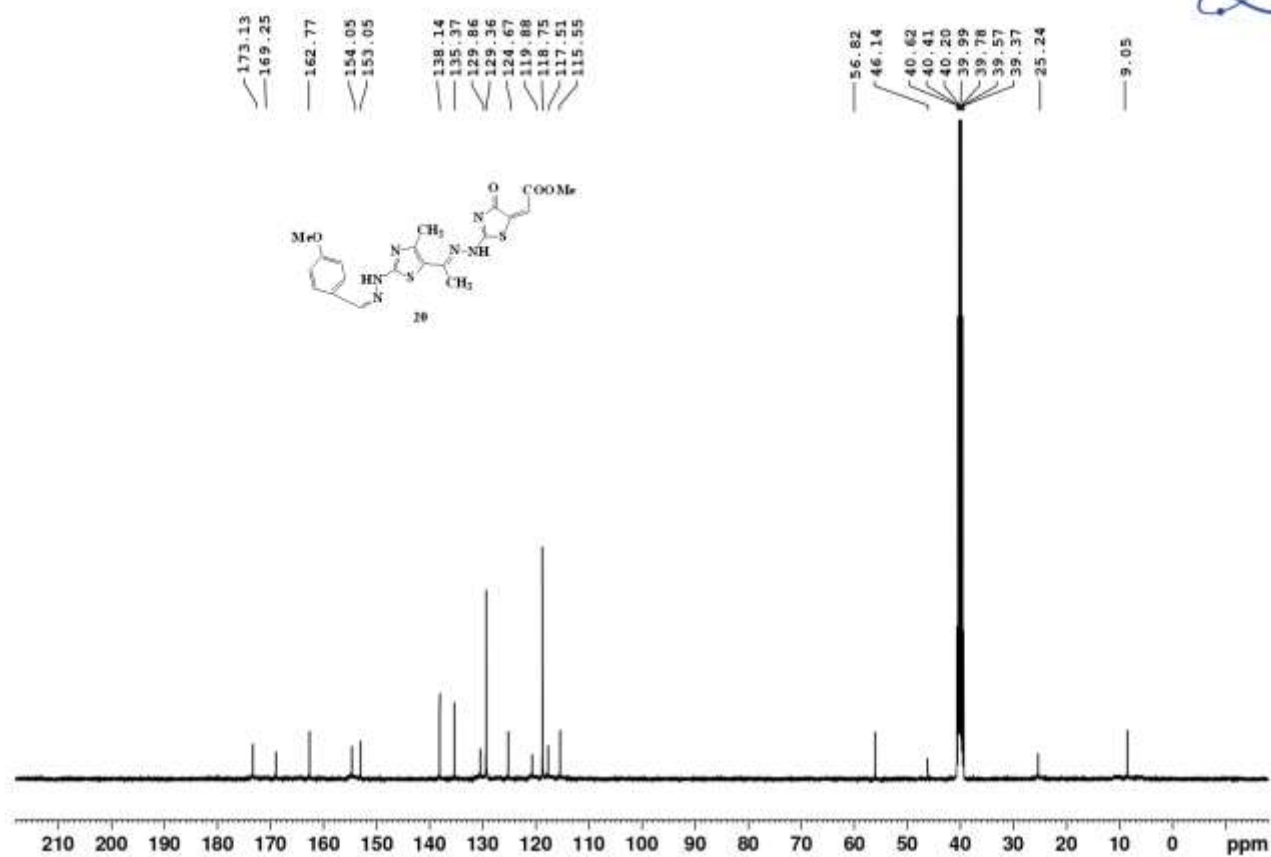

Figure S39. <sup>13</sup>CNMR Spectra of compound 20
